# Supplementary material for: Computational assessment of nitrogen-rich peracids: a family of peroxide-based energetic materials
Source: Royal Society of Chemistry journal article supplement (doi:10.1039/c7ra02201h), 2017-01-01
Supplement: c7ra02201h1.pdf [file c7ra02201h1.pdf]

## Supporting Information

### Computational Details

Computations were carried out using the Gaussian 09 program suite.<sup>1</sup> The structure optimizations are performed with B3PW91 functional with 6-31G(d,p) basis set and characterized to be true local energy minima on the potential energy surface and no imaginary frequencies were found. The calculated total energies ( $E_0$ ), zero point energies (ZPE), and thermal corrections ( $\Delta H_T$ ) at the B3PW91/6-31G(d,p) level for the peracid compounds are listed in Table S1. Isodesmic reactions were designed to compute the gas phase heats of formation ( $\text{HOF}_{\text{Gas}}$ ) and summarized in Figure S2. The usage of the  $\text{HOF}_{\text{Gas}}$  in the calculation of detonation properties slightly overestimates the values of detonation velocity and detonation pressure, and hence, the solid phase HOF ( $\text{HOF}_{\text{Solid}}$ ) have been calculated which can efficiently reduce the errors. The  $\text{HOF}_{\text{Solid}}$  is calculated as the difference between  $\text{HOF}_{\text{Gas}}$  and heat of sublimation ( $\text{HOF}_{\text{Sub}}$ ) as,

$$\text{HOF}_{\text{Solid}} = \text{HOF}_{\text{Gas}} - \text{HOF}_{\text{Sub}} \quad (1)$$

The heat of sublimation ( $\text{HOF}_{\text{Sub}}$ ), which is required to convert the  $\text{HOF}_{\text{Gas}}$  to the  $\text{HOF}_{\text{Solid}}$ , was calculated from Equation (2),<sup>2</sup>

$$\text{HOF}_{\text{Sub}} = 4.4307 \times 10^{-4} A^2 + 2.0599 (v \sigma_{\text{tot}}^2)^{0.5} - 2.4825 \quad (2)$$

where  $A$  represent the surface area of the 0.001 electrons/bohr<sup>3</sup> isosurface of electronic density,  $v$  denotes the degree of balance between the positive and negative surface potentials, and  $\sigma_{\text{tot}}^2$  is the electrostatic potential variance. These molecular surface properties were obtained using the Multiwfn program<sup>3</sup> and listed in Table S2.

The density has been referred to as “the primary physical parameter in detonation performance” of explosives.<sup>4-10</sup> For example, the important performance attribute of detonation velocity is proportional to density, while the detonation pressure is proportional to the square of the initial density.<sup>11</sup> An increase in density is also desirable in terms of the amount of material that can be packed into volume-limited warhead or propulsion configurations. The densities ( $\rho$ ) for peracid compounds were calculated using the equation (3), as suggested by Politzer et al.<sup>12</sup> for CHNO energetic compounds,

$$\rho = 0.9183 \left( \frac{M}{V_m} \right) + 0.0028 (v\sigma_{tot}^2) + 0.0443 \quad (3)$$

where,  $M$  is the molecular mass in g/mol.  $V_m$  is the volume enclosed by the 0.001 au contour of the molecule's electronic density and  $v\sigma_{tot}^2$  is an electrostatic interaction index.

Oxygen balance (OB) is one of the parameter of quantifying how well an explosive provides its own oxidant.<sup>13</sup> Most of the energy released comes from oxidation (reaction with oxygen), the amount of oxygen available is a critical factor. If excess oxygen molecules are remaining after the oxidation reaction, the oxidizer is said to have a ‘positive’ OB. If the oxygen molecules are completely consumed and excess fuel molecules remain, the oxidizer is said to have a ‘negative’ OB. If neutral OB (OB = 0%), means that there is exactly enough oxygen for the complete oxidation. It is reported that the heat of detonation ( $Q$ ) reaches a maximum for an OB of zero, since this corresponds to the stoichiometric oxidation of carbon to carbon dioxide and hydrogen to water. The OB can therefore be used to optimize the composition of the explosive to give an OB as close to zero as possible. In addition, knowledge of OB in explosives can be applied is in the processing of mixtures of explosives. OB (%) for an explosive containing the general formula  $C_aH_bN_cO_d$  with molecular mass  $M$  can be calculated as,

$$OB(\%) = \frac{(d - 2a - 0.5b)}{M} \times 1600 \quad (4)$$

The detonation velocity ( $D$  in km/s) and detonation pressure ( $P$  in GPa) are the performance parameters, computed using the empirical Kamlet–Jacobs equations:<sup>11</sup>

$$N = \frac{2c + 2d + b}{48a + 4b + 56c + 64d} \quad (5)$$

$$M = \frac{56c + 88d - 8b}{2c + 2d + b} \quad (6)$$

$$Q = \frac{28.9b + 47 \left( d - \frac{b}{2} \right) + HOF_{Explosive}}{12a + b + 14c + 16d} \quad (7)$$

$$D = 1.01(NM^{0.5}Q^{0.5})^{0.5}(1+1.30\rho) \quad (8)$$

$$P = 1.55\rho^2NM^{0.5}Q^{0.5} \quad (9)$$

in which,  $N$  represents the moles of detonation gases per gram explosive,  $M$  is the average molecular weight of these gases(g/mol),  $Q$  denotes the heat of detonation (cal/g), and  $\rho$  is the predicted density of salts (g/cm<sup>3</sup>).

The methodology proposed by Akhavan<sup>14</sup> has been used to predict explosive power and power index using the heat of detonation ( $Q$ ) and volume ( $V$ ) of gaseous explosion products. Power index is a comparative numerical value used to rank the relative power of an explosive based on the heat and volume of gases produced by detonation of 1.0 gram of explosive.

$$\text{Explosive Power} = QV \quad (10)$$

$$\text{Power Index} = \frac{QV}{Q_{\text{Picric acid}}V_{(\text{Picric acid})}} \times 100 \quad (11)$$

In the present work, decomposition products of peracids are predicted by using the ‘Kistiakowsky-Wilson’ rules (K-W rules). These rules should only be used for moderately oxygen deficient explosives with an oxygen balance greater than – 40 %. Under these circumstances, the modified Kistiakowsky-Wilson rules are employed. The predicted decomposition reactions for the peracid compounds are summarized in Tables S3.

#### *Kistiakowsky-Wilson Rules*

1. Carbon atoms are converted to carbon monoxide.
2. If any oxygen remains then hydrogen is then oxidized to water.
3. If any oxygen still remains then carbon monoxide is oxidized to carbon dioxide.
4. All the nitrogen is converted to nitrogen gas, N<sub>2</sub>.

#### *Modified Kistiakowsky-Wilson Rules*

1. Hydrogen atoms are converted to water.
2. If any oxygen remains then carbon is converted to carbon monoxide.
3. If any oxygen still remains then carbon monoxide is oxidized to carbon dioxide.
4. All the nitrogen is converted to nitrogen gas, N<sub>2</sub>.

Brisance for C<sub>a</sub>H<sub>b</sub>N<sub>c</sub>O<sub>d</sub> based explosives relative to TNT is calculated using the correlation suggested by Keshavarz et al<sup>15</sup> and given as following:

$$\text{Bris}_{rel/TNT} = 85.5 + 4.812c + 2.556\left(d - a - \frac{b}{2}\right) - 35.96\text{Bris}^- + 19.69\text{Bris}^+ \quad (12)$$

Where in above equation, Bris<sub>core</sub> is the core brisance, which is based on the number of nitrogen atoms and the distribution of oxygen atoms between carbon and hydrogen atoms;

$Bris^+$  and  $Bris^-$  are correcting positive and negative functions for those values obtained on the basis of  $Bris_{core}$ .

Gurney<sup>16</sup> developed a simple model that permits the estimation of the velocity of metal driven by a detonating explosive. This model assumes that a given explosive liberates a fixed amount of specific energy (E) on detonation that is converted to kinetic energy partitioned between the driven metal and gaseous products. The specific energy determines the amount of mechanical work for the acceleration of the surrounding metal that can be done by the explosive. The Gurney velocity ( $\sqrt{2E}$ ) provides a more relevant absolute indicator of the ability of an explosive to accelerate material under a wide variety of initial densities and geometries of interest. The Gurney velocity is predicted using Kamlet and Finger (K-F) method,<sup>17</sup> equation (13) and validated with Hardesty and Kennedy (H-K) method,<sup>18</sup> equation (14).

$$\sqrt{\Delta E} = 0.887\Phi^{0.5}\rho^{0.4} \quad (13)$$

$$\sqrt{\Delta E} = 0.6 + 0.54\sqrt{1.44\Phi\rho} \quad (14)$$

Where in above equations,  $\rho$  is the density in  $g/cm^3$  and  $\Phi$  is the quantity used by Kamlet and Jacobs<sup>11</sup> to calculate detonation properties, depends on: 1. the number of moles of gaseous detonation products per gram of explosive, 2. the average molecular weight of these gases, and 3. the heat of detonation in calories per gram.

Most of the explosives contain C, H, N, and O atoms. During an explosive reaction, the molecule uses the oxygen atoms available within it and does not depend on the external, atmospheric oxygen; it probably has no time for that because of the fast nature of the explosive process. It must be noted that all oxidation reactions are exothermic.<sup>19</sup> The heat of combustion ( $\Delta H_c$ ) is defined as the heat evolved when 1 mole of a compound is completely burnt in excess of oxygen. It means that all C atoms and H atoms in the molecule are

converted into carbon dioxide (CO<sub>2</sub>) and water (H<sub>2</sub>O) combustion products, respectively. A fuel burning in air gives out heat of combustion. Heat of combustion is often referred to as the “calorific value.” The HOFs of CO<sub>2</sub> and H<sub>2</sub>O are -94.05 and -67.42 kcal/mol, respectively.

$$\Delta H_c = HOF_{\text{combustion products}} - HOF_{\text{explosive}} \quad (15)$$

### List of Tables

**Table S1.** Total energy (E<sub>0</sub>), zero point energy (ZPE), and thermal correction (ΔH<sub>T</sub>) at the B3PW91/6-31G(d,p) Level for the peracid compounds.

| Compd. | E <sub>0</sub> (a.u.) | ZPE (a.u.) | H <sub>T</sub> (a.u.) |
|--------|-----------------------|------------|-----------------------|
| P1     | -505.670443           | 0.0786     | 0.0083                |
| P2     | -710.071345           | 0.0809     | 0.0108                |
| P3     | -446.505225           | 0.0631     | 0.0068                |
| P4     | -650.904844           | 0.0654     | 0.0094                |
| P5     | -521.673247           | 0.0655     | 0.0083                |
| P6     | -462.505261           | 0.0500     | 0.0067                |
| P7     | -1070.874778          | 0.1184     | 0.0173                |
| P8     | -1011.712724          | 0.1029     | 0.0159                |
| P9     | -952.54976            | 0.0873     | 0.0145                |
| P10    | -893.385905           | 0.0718     | 0.0131                |
| P11    | -823.271299           | 0.0868     | 0.0133                |
| P12    | -764.106518           | 0.0713     | 0.0118                |
| P13    | -704.940844           | 0.0557     | 0.0103                |
| P14    | -1119.542072          | 0.1462     | 0.0180                |
| P15    | -1060.385217          | 0.1308     | 0.0164                |
| P16    | -1001.228414          | 0.1154     | 0.0149                |
| P17    | -1151.483972          | 0.1186     | 0.0178                |
| P18    | -1092.310948          | 0.1029     | 0.0163                |
| P19    | -1033.137028          | 0.0871     | 0.0149                |
| P20    | -1722.838004          | 0.1903     | 0.0280                |
| P21    | -1663.676906          | 0.1748     | 0.0275                |
| P22    | -1604.513721          | 0.1592     | 0.0251                |
| P23    | -1604.514394          | 0.1592     | 0.0251                |
| P24    | -1545.350456          | 0.1435     | 0.0237                |
| P25    | -1486.187057          | 0.1280     | 0.0223                |

|     |              |        |        |
|-----|--------------|--------|--------|
| P26 | -1227.629657 | 0.1270 | 0.0197 |
| P27 | -1168.465153 | 0.1116 | 0.0182 |
| P28 | -1109.299896 | 0.0961 | 0.0167 |

**Table S2.** Molecular surface properties of peracid compounds.

| Compd. | Surface Area (Å <sup>2</sup> ) | Volume (Å <sup>3</sup> ) | $\sigma_{tot}^2$ (kJ/mol) | $\nu$  |
|--------|--------------------------------|--------------------------|---------------------------|--------|
| P1     | 141.1                          | 127.3                    | 1633.9                    | 0.1819 |
| P2     | 169.9                          | 156.8                    | 1153.5                    | 0.1441 |
| P3     | 126.0                          | 111.6                    | 1779.9                    | 0.1680 |
| P4     | 154.7                          | 141.2                    | 1362.7                    | 0.1228 |
| P5     | 137.0                          | 122.8                    | 1420.9                    | 0.1739 |
| P6     | 121.7                          | 107.1                    | 1521.3                    | 0.1185 |
| P7     | 239.3                          | 231.1                    | 715.9                     | 0.1818 |
| P8     | 225.4                          | 215.9                    | 766.9                     | 0.1338 |
| P9     | 211.4                          | 200.7                    | 841.0                     | 0.0847 |
| P10    | 201.3                          | 185.4                    | 927.2                     | 0.0738 |
| P11    | 191.9                          | 181.7                    | 728.9                     | 0.1564 |
| P12    | 177.9                          | 166.4                    | 786.2                     | 0.1024 |
| P13    | 163.8                          | 151.2                    | 883.7                     | 0.0604 |
| P14    | 269.4                          | 262.1                    | 1030.9                    | 0.1697 |
| P15    | 254.3                          | 246.7                    | 1138.5                    | 0.1600 |
| P16    | 239.2                          | 231.3                    | 1228.8                    | 0.1364 |
| P17    | 258.1                          | 253.8                    | 714.6                     | 0.1546 |
| P18    | 243.3                          | 238.9                    | 728.4                     | 0.1296 |
| P19    | 229.0                          | 223.2                    | 771.9                     | 0.0968 |
| P20    | 380.4                          | 380.3                    | 646.4                     | 0.1800 |
| P21    | 366.5                          | 364.9                    | 692.5                     | 0.1641 |
| P22    | 352.1                          | 349.6                    | 730.1                     | 0.1332 |
| P23    | 352.5                          | 349.7                    | 728.4                     | 0.1271 |
| P24    | 338.4                          | 334.5                    | 789.1                     | 0.0994 |
| P25    | 324.1                          | 319.2                    | 860.6                     | 0.0713 |
| P26    | 285.3                          | 281.1                    | 667.3                     | 0.1570 |
| P27    | 271.1                          | 265.8                    | 709.6                     | 0.1246 |

|     |       |       |       |        |
|-----|-------|-------|-------|--------|
| P28 | 257.0 | 250.5 | 771.1 | 0.0923 |
|-----|-------|-------|-------|--------|

Surface area and volume are computed on the 0.001 au molecular surfaces.  $\sigma_{tot}^2$  indicate the variability of the electrostatic potential,  $\nu$  is the degree of balance between the positive and the negative potentials on a molecular surface and is unitless.

**Table S3.** Decomposition reactions designed for the calculation of heat of detonation (Q).

| Compd. | Decomposition reaction                                           |
|--------|------------------------------------------------------------------|
| P1     | $C_3H_3N_3O_3 \rightarrow 1.5CO + 1.5H_2O + 1.5C + 1.5N_2$       |
| P2     | $C_3H_2N_4O_5 \rightarrow 2CO + CO_2 + H_2O + 2.5N_2$            |
| P3     | $C_2H_2N_4O_2 \rightarrow CO + H_2O + C + 2N_2$                  |
| P4     | $C_2HN_5O_4 \rightarrow 0.5CO + 1.5CO_2 + 0.5H_2O + 2.5N_2$      |
| P5     | $C_2H_2N_4O_3 \rightarrow 2CO + H_2O + 2N_2$                     |
| P6     | $CHN_5O_2 \rightarrow 0.5CO + 0.5CO_2 + 0.5H_2O + 2.5N_2$        |
| P7     | $C_6H_3N_3O_9 \rightarrow 4.5CO + 1.5CO_2 + 1.5H_2O + 1.5N_2$    |
| P8     | $C_5H_2N_4O_8 \rightarrow 3CO + 2CO_2 + H_2O + 2N_2$             |
| P9     | $C_4HN_5O_7 \rightarrow 1.5CO + 2.5CO_2 + 0.5H_2O + 2.5N_2$      |
| P10    | $C_3N_6O_6 \rightarrow 3CO_2 + 3N_2$                             |
| P11    | $C_4H_2N_4O_6 \rightarrow 3CO + CO_2 + H_2O + 2N_2$              |
| P12    | $C_3HN_5O_5 \rightarrow 1.5CO + 1.5CO_2 + 0.5H_2O + 2.5N_2$      |
| P13    | $C_2N_6O_4 \rightarrow 2CO_2 + 3N_2$                             |
| P14    | $C_6H_4N_8O_6 \rightarrow 4CO + 2H_2O + 2C + 4N_2$               |
| P15    | $C_5H_3N_9O_5 \rightarrow 3.5CO + 1.5H_2O + 4.5N_2 + 1.5C$       |
| P16    | $C_4H_2N_{10}O_4 \rightarrow 3CO + H_2O + 5N_2 + C$              |
| P17    | $C_4H_2N_{10}O_6 \rightarrow 3CO + CO_2 + H_2O + 5N_2$           |
| P18    | $C_3HN_{11}O_5 \rightarrow 1.5CO + 1.5CO_2 + 0.5H_2O + 5.5N_2$   |
| P19    | $C_2N_{12}O_4 \rightarrow 2CO_2 + 6N_2$                          |
| P20    | $C_{10}H_4N_8O_{12} \rightarrow 10CO + 2H_2O + 4N_2$             |
| P21    | $C_9H_3N_9O_{11} \rightarrow 8.5CO + 0.5CO_2 + 1.5H_2O + 4.5N_2$ |
| P22    | $C_8H_2N_{10}O_{10} \rightarrow 7CO + CO_2 + H_2O + 5N_2$        |
| P23    | $C_8H_2N_{10}O_{10} \rightarrow 7CO + CO_2 + H_2O + 5N_2$        |
| P24    | $C_7HN_{11}O_9 \rightarrow 5.5CO + 1.5CO_2 + 0.5H_2O + 5.5N_2$   |
| P25    | $C_6N_{12}O_8 \rightarrow 4CO + 2CO_2 + 6N_2$                    |
| P26    | $C_6H_2N_{10}O_6 \rightarrow 5CO + H_2O + 5N_2 + C$              |



|     |                                                             |
|-----|-------------------------------------------------------------|
| P27 | $C_5HN_{11}O_5 \rightarrow 4.5CO + 0.5H_2O + 5.5N_2 + 0.5C$ |
| P28 | $C_4N_{12}O_4 \rightarrow 4CO + 6N_2$                       |

**Table S4.** Decomposition reactions designed for the calculation of heat of combustion ( $\Delta H_c$ )

| Compd. | Decomposition reaction                                           |
|--------|------------------------------------------------------------------|
| P1     | $C_3H_3N_3O_3 + 2.25O_2 \rightarrow 3CO_2 + 1.5H_2O + 1.5N_2$    |
| P2     | $C_3H_2N_4O_5 + O_2 \rightarrow 3CO_2 + H_2O + 2.5N_2$           |
| P3     | $C_2H_2N_4O_2 + 1.5O_2 \rightarrow 2CO_2 + H_2O + 2N_2$          |
| P4     | $C_2HN_5O_4 + 0.25O_2 \rightarrow 2CO_2 + 0.5H_2O + 2.5N_2$      |
| P5     | $C_2H_2N_4O_3 + O_2 \rightarrow 2CO_2 + H_2O + 2N_2$             |
| P6     | $CHN_5O_2 + 0.25O_2 \rightarrow CO_2 + 0.5H_2O + 2.5N_2$         |
| P7     | $C_6H_3N_3O_9 + 2.25O_2 \rightarrow 6CO_2 + 1.5H_2O + 4.5N_2$    |
| P8     | $C_5H_2N_4O_8 + 1.5O_2 \rightarrow 5CO_2 + H_2O + 2N_2$          |
| P9     | $C_4HN_5O_7 + 0.75O_2 \rightarrow 4CO_2 + 0.5H_2O + 2.5N_2$      |
| P10    | $C_3N_6O_6 \rightarrow 3CO_2 + 3N_2$                             |
| P11    | $C_4H_2N_4O_6 + 1.5O_2 \rightarrow 4CO_2 + H_2O + 2N_2$          |
| P12    | $C_3HN_5O_5 + 0.75O_2 \rightarrow 3CO_2 + 0.5H_2O + 2.5N_2$      |
| P13    | $C_2N_6O_4 \rightarrow 2CO_2 + 3N_2$                             |
| P14    | $C_6H_4N_8O_6 + 4O_2 \rightarrow 6CO_2 + 2H_2O + 5N_2$           |
| P15    | $C_5H_3N_9O_5 + 3.25O_2 \rightarrow 5CO_2 + 1.5H_2O + 4.5N_2$    |
| P16    | $C_4H_2N_{10}O_4 + 2.5O_2 \rightarrow 4CO_2 + H_2O + 5N_2$       |
| P17    | $C_4H_2N_{10}O_6 + 1.5O_2 \rightarrow 4CO_2 + H_2O + 5N_2$       |
| P18    | $C_3HN_{11}O_5 + 0.75O_2 \rightarrow 3CO_2 + 0.5H_2O + 5.5N_2$   |
| P19    | $C_2N_{12}O_4 \rightarrow 2CO_2 + 6N_2$                          |
| P20    | $C_{10}H_4N_8O_{12} + 5O_2 \rightarrow 10CO_2 + 2H_2O + 4N_2$    |
| P21    | $C_9H_3N_9O_{11} + 4.25O_2 \rightarrow 9CO_2 + 1.5H_2O + 4.5N_2$ |
| P22    | $C_8H_2N_{10}O_{10} + 3.5O_2 \rightarrow 8CO_2 + H_2O + 5N_2$    |
| P23    | $C_8H_2N_{10}O_{10} + 3.5O_2 \rightarrow 8CO_2 + H_2O + 5N_2$    |
| P24    | $C_7HN_{11}O_9 + 2.75O_2 \rightarrow 7CO_2 + 0.5H_2O + 5.5N_2$   |
| P25    | $C_6N_{12}O_8 + 2O_2 \rightarrow 6CO_2 + 6N_2$                   |

|     |                                                                |
|-----|----------------------------------------------------------------|
| P26 | $C_6H_2N_{10}O_6 + 3.5O_2 \rightarrow 6CO_2 + H_2O + 5N_2$     |
| P27 | $C_5HN_{11}O_5 + 2.75O_2 \rightarrow 5CO_2 + 0.5H_2O + 5.5N_2$ |
| P28 | $C_4N_{12}O_4 + 2O_2 \rightarrow 4CO_2 + 6N_2$                 |

**Table S5.** Reported heat of formation in solid phase ( $HOF_{Solid}$ , kJ/mol), density ( $g/cm^3$ ), detonation velocity ( $D$ , km/s), detonation pressure ( $P$ , GPa), chemical energy of detonation ( $Q$ , cal/g), explosive power (EP,  $kJ \cdot dm^3/g^2$ ), and power index (PI, %) for TNT (2,4,6-trinitrotoluene) and RDX (hexahydro-1,3,5-trinitro-1,3,5-triazine).

| Compd. | $HOF_{Solid}$<br>(kJ/mol) | Density<br>( $g/cm^3$ ) | $D$<br>(km/s)      | $P$<br>(GPa)       | EP<br>( $kJ \cdot dm^3/g^2$ ) | PI<br>(%)         |
|--------|---------------------------|-------------------------|--------------------|--------------------|-------------------------------|-------------------|
| TNT    | -67.36 <sup>20</sup>      | 1.64 <sup>21</sup>      | 6.94 <sup>21</sup> | 22.0 <sup>21</sup> | 3143 <sup>14</sup>            | 116 <sup>14</sup> |
| RDX    | 79.08 <sup>20</sup>       | 1.80 <sup>22</sup>      | 8.60 <sup>22</sup> | 33.9 <sup>22</sup> | 4573 <sup>14</sup>            | 169 <sup>14</sup> |

**Table S6.** Reported heat of combustion ( $\Delta H_c$ , cal/g), brisance, and Gurney velocity ( $\sqrt{2E}$ , km/s) for TNT and RDX.

| Compd. | $\Delta H_c$ (cal/g) | Brisance          | $\sqrt{2E}$ (km/s)                         |                    |
|--------|----------------------|-------------------|--------------------------------------------|--------------------|
|        |                      |                   | K-F method                                 | H-K method         |
| TNT    | 3571                 | 100 <sup>15</sup> | 2.37 <sup>17</sup><br>(2.37) <sup>17</sup> | 2.42 <sup>18</sup> |
| RDX    | 2255 <sup>15</sup>   | 140 <sup>15</sup> | 2.90 <sup>17</sup><br>(2.93) <sup>17</sup> | 2.85 <sup>18</sup> |

K-F method: Kamlet-Finger method [Ref. 17], H-K method: Hardesty- Kennedy method [Ref. 18]. The parenthesis values indicate the experimental data of Gurney velocity.

**Table S7.** Total energy ( $E_0$ ) at 298K and  $HOF_{Gas}$  for the reference compounds used in isodesmic reactions at the B3PW91/6-31G(d,p) level.

| Compd.         | $E_0$<br>(a.u.) | ZPE<br>(a.u.) | $H_T$<br>(a.u.) | $HOF_{Gas}$ (kJ/mol) |
|----------------|-----------------|---------------|-----------------|----------------------|
| 1,2,4-Triazole | -242.100673     | 0.060396      | 0.004479        | 192.7 <sup>23</sup>  |

|                                   |             |          |          |                      |
|-----------------------------------|-------------|----------|----------|----------------------|
| Tetrazole                         | -258.107670 | 0.047452 | 0.00439  | 320 <sup>24</sup>    |
| 1,3,5-Triazine                    | -280.187731 | 0.065657 | 0.005073 | 225.8 <sup>25</sup>  |
| 1,2,4,5-Tetrazine                 | -296.149971 | 0.051685 | 0.005188 | 487.2 <sup>a</sup>   |
| CH <sub>3</sub> NNCH <sub>3</sub> | -189.119052 | 0.084721 | 0.006074 | 159.44 <sup>a</sup>  |
| NH <sub>2</sub> NNNH <sub>2</sub> | -221.183657 | 0.063655 | 0.005455 | 307.49 <sup>a</sup>  |
| CH <sub>3</sub> COOOH             | -304.019595 | 0.064852 | 0.006847 | -321.43 <sup>a</sup> |
| CH <sub>3</sub> NO <sub>2</sub>   | -244.866536 | 0.050348 | 0.005192 | -81 <sup>26</sup>    |
| CH <sub>4</sub>                   | -40.459760  | 0.045119 | 0.003812 | -74.6 <sup>27</sup>  |
| NH <sub>3</sub>                   | -56.499062  | 0.034638 | 0.003808 | -45.94 <sup>28</sup> |

<sup>a</sup>Heat of formation calculated by the G3 composite method.

**Table S8.** Total energies ( $E_0$ ), zero point energies (ZPE), and thermal corrections ( $\Delta H_T$ ) at the B3LYP functional with 6-31G, 6-311G(d,p), and aug-cc-pVTZ basis set for **P1**, **P2**, **P5** and **P11** peracid compounds.

| Compd.            | $E_0$ (a.u.) | ZPE (a.u.) | $H_T$ (a.u.) |
|-------------------|--------------|------------|--------------|
|                   | B3LYP/6-31G  |            |              |
| P1                | -505.66450   | 0.0765     | 0.0084       |
| P2                | -710.056637  | 0.0776     | 0.0110       |
| P5                | -521.654308  | 0.0625     | 0.0085       |
| P11               | -823.261360  | 0.0821     | 0.0137       |
| B3LYP/6-311G(d,p) |              |            |              |
| P1                | -505.993635  | 0.0777     | 0.0083       |
| P2                | -710.527518  | 0.0798     | 0.0109       |
| P5                | -522.006434  | 0.0646     | 0.0084       |
| P11               | -823.807394  | 0.0856     | 0.0116       |
| B3LYP/aug-cc-pVTZ |              |            |              |
| P1                | -506.58523   | 0.0776     | 0.0083       |
| P2                | -710.618888  | 0.0797     | 0.0109       |
| P5                | -522.074566  | 0.0646     | 0.0083       |
| P11               | -823.912757  | 0.0858     | 0.0133       |

**Cartesian coordinates (Å) of the individual compounds studied in the present work at the B3PW91/6-31G(d,p) level**

| <b>Compound: P1</b> |               |             |                         |           |           |
|---------------------|---------------|-------------|-------------------------|-----------|-----------|
| Center Number       | Atomic Number | Atomic Type | Coordinates (Angstroms) |           |           |
|                     |               |             | X                       | Y         | Z         |
| 1                   | 7             | 0           | -2.528776               | 0.457866  | 0.000262  |
| 2                   | 7             | 0           | -1.352206               | 1.093707  | 0.000376  |
| 3                   | 6             | 0           | -0.499945               | 0.074076  | -0.000022 |
| 4                   | 6             | 0           | -2.353578               | -0.883735 | -0.000198 |
| 5                   | 7             | 0           | -1.069008               | -1.162973 | -0.000411 |
| 6                   | 6             | 0           | 0.954584                | 0.326288  | -0.000116 |
| 7                   | 8             | 0           | 1.491934                | 1.415776  | -0.000514 |
| 8                   | 8             | 0           | 1.653381                | -0.824541 | 0.000368  |
| 9                   | 8             | 0           | 3.050574                | -0.548511 | 0.000173  |
| 10                  | 1             | 0           | -3.384920               | 0.992545  | 0.000472  |
| 11                  | 1             | 0           | -3.168827               | -1.593868 | -0.000384 |
| 12                  | 1             | 0           | 3.030191                | 0.439559  | 0.000121  |

| <b>Compound: P2</b> |               |             |                         |           |           |
|---------------------|---------------|-------------|-------------------------|-----------|-----------|
| Center Number       | Atomic Number | Atomic Type | Coordinates (Angstroms) |           |           |
|                     |               |             | X                       | Y         | Z         |
| 1                   | 7             | 0           | 1.083212                | 1.337747  | -0.000081 |
| 2                   | 6             | 0           | 1.477981                | 0.048297  | 0.000016  |
| 3                   | 7             | 0           | 0.457599                | -0.767784 | 0.000132  |
| 4                   | 7             | 0           | -0.244321               | 1.397034  | -0.000114 |
| 5                   | 6             | 0           | -0.582327               | 0.104262  | 0.000026  |
| 6                   | 7             | 0           | 2.886140                | -0.293960 | 0.000004  |
| 7                   | 8             | 0           | 3.187275                | -1.468604 | 0.000093  |
| 8                   | 8             | 0           | 3.646504                | 0.672587  | -0.000036 |
| 9                   | 6             | 0           | -1.986567               | -0.366036 | 0.000061  |
| 10                  | 8             | 0           | -2.336142               | -1.526003 | -0.000247 |
| 11                  | 8             | 0           | -2.851273               | 0.662923  | 0.000128  |
| 12                  | 8             | 0           | -4.191915               | 0.183391  | 0.000134  |
| 13                  | 1             | 0           | 1.664243                | 2.166225  | -0.000175 |
| 14                  | 1             | 0           | -4.032781               | -0.790976 | -0.000592 |

-----

| <b>Compound: P3</b> |               |             |                         |           |           |  |
|---------------------|---------------|-------------|-------------------------|-----------|-----------|--|
| Center Number       | Atomic Number | Atomic Type | Coordinates (Angstroms) |           |           |  |
|                     |               |             | X                       | Y         | Z         |  |
| 1                   | 7             | 0           | -0.742541               | 1.158399  | -0.000388 |  |
| 2                   | 6             | 0           | -0.029874               | 0.013597  | -0.000002 |  |
| 3                   | 6             | 0           | -1.978418               | 0.703608  | -0.000281 |  |
| 4                   | 7             | 0           | -0.712665               | -1.117373 | 0.000387  |  |
| 5                   | 7             | 0           | -1.967238               | -0.649409 | 0.000305  |  |
| 6                   | 7             | 0           | 1.429223                | 0.001283  | 0.000005  |  |
| 7                   | 8             | 0           | 1.969459                | -1.094078 | -0.000545 |  |
| 8                   | 8             | 0           | 1.983792                | 1.087655  | 0.000528  |  |
| 9                   | 1             | 0           | -2.882631               | 1.296260  | -0.000398 |  |
| 10                  | 1             | 0           | -2.741078               | -1.298407 | 0.000076  |  |

| <b>Compound: P4</b> |               |             |                         |           |           |  |
|---------------------|---------------|-------------|-------------------------|-----------|-----------|--|
| Center Number       | Atomic Number | Atomic Type | Coordinates (Angstroms) |           |           |  |
|                     |               |             | X                       | Y         | Z         |  |
| 1                   | 7             | 0           | -0.022874               | -0.752274 | -0.000166 |  |
| 2                   | 6             | 0           | -1.032638               | 0.137305  | -0.000109 |  |
| 3                   | 6             | 0           | 1.008628                | 0.053575  | -0.000047 |  |
| 4                   | 7             | 0           | -0.701334               | 1.422985  | 0.000198  |  |
| 5                   | 7             | 0           | 0.627465                | 1.346951  | 0.000297  |  |
| 6                   | 7             | 0           | 2.413915                | -0.306208 | -0.000089 |  |
| 7                   | 8             | 0           | 2.699099                | -1.484150 | -0.000194 |  |
| 8                   | 8             | 0           | 3.182729                | 0.652726  | 0.000055  |  |
| 9                   | 7             | 0           | -2.436769               | -0.271469 | -0.000054 |  |
| 10                  | 8             | 0           | -3.261140               | 0.627430  | -0.000544 |  |
| 11                  | 8             | 0           | -2.650162               | -1.470416 | 0.000574  |  |
| 12                  | 1             | 0           | 1.217033                | 2.170102  | 0.000490  |  |

| <b>Compound: P5</b> |               |             |                         |   |   |  |
|---------------------|---------------|-------------|-------------------------|---|---|--|
| Center Number       | Atomic Number | Atomic Type | Coordinates (Angstroms) |   |   |  |
|                     |               |             | X                       | Y | Z |  |
| -----               |               |             |                         |   |   |  |

|    |   |   |           |           |           |
|----|---|---|-----------|-----------|-----------|
| 1  | 7 | 0 | -1.418846 | 0.963396  | 0.000091  |
| 2  | 6 | 0 | -0.503352 | -0.023324 | 0.000089  |
| 3  | 7 | 0 | -1.140592 | -1.177658 | -0.000191 |
| 4  | 7 | 0 | -2.633942 | 0.417173  | 0.000120  |
| 5  | 7 | 0 | -2.452015 | -0.868419 | -0.000183 |
| 6  | 6 | 0 | 0.935717  | 0.273840  | 0.000219  |
| 7  | 8 | 0 | 1.387291  | 1.404898  | -0.000264 |
| 8  | 8 | 0 | 1.688696  | -0.827518 | 0.000248  |
| 9  | 8 | 0 | 3.071446  | -0.490356 | -0.000065 |
| 10 | 1 | 0 | -1.279945 | 1.964873  | 0.000266  |
| 11 | 1 | 0 | 3.024049  | 0.494403  | -0.000329 |

**Compound: P6**

| Center Number | Atomic Number | Atomic Type | Coordinates (Angstroms) |           |           |
|---------------|---------------|-------------|-------------------------|-----------|-----------|
|               |               |             | X                       | Y         | Z         |
| 1             | 7             | 0           | -2.059245               | -0.689080 | 0.000161  |
| 2             | 7             | 0           | -0.795318               | -1.162744 | -0.000235 |
| 3             | 7             | 0           | -2.079394               | 0.610406  | 0.000252  |
| 4             | 6             | 0           | -0.038821               | -0.095853 | -0.000031 |
| 5             | 7             | 0           | -0.805544               | 1.003431  | -0.000287 |
| 6             | 7             | 0           | 1.406026                | -0.023080 | -0.000047 |
| 7             | 8             | 0           | 1.860809                | 1.118541  | 0.000140  |
| 8             | 8             | 0           | 2.026097                | -1.065226 | 0.000074  |
| 9             | 1             | 0           | -0.527994               | 1.976072  | -0.000432 |

**Compound: P7**

| Center Number | Atomic Number | Atomic Type | Coordinates (Angstroms) |           |           |
|---------------|---------------|-------------|-------------------------|-----------|-----------|
|               |               |             | X                       | Y         | Z         |
| 1             | 7             | 0           | 0.861688                | -1.065378 | -0.000116 |
| 2             | 6             | 0           | -0.463175               | -1.203891 | -0.000278 |
| 3             | 6             | 0           | 1.274211                | 0.200714  | 0.000268  |
| 4             | 7             | 0           | -1.353356               | -0.213565 | -0.000321 |
| 5             | 7             | 0           | 0.491830                | 1.278878  | 0.000276  |
| 6             | 6             | 0           | -0.810855               | 1.003037  | -0.000113 |
| 7             | 6             | 0           | 2.758471                | 0.474668  | 0.000676  |
| 8             | 8             | 0           | 3.259870                | 1.575886  | 0.002403  |
| 9             | 8             | 0           | 3.466142                | -0.661718 | -0.001008 |
| 10            | 8             | 0           | 4.858749                | -0.379036 | -0.000463 |
| 11            | 6             | 0           | -1.790180               | 2.151422  | -0.000326 |
| 12            | 8             | 0           | -2.994536               | 2.034870  | -0.000406 |
| 13            | 8             | 0           | -1.160027               | 3.332628  | -0.000495 |
| 14            | 8             | 0           | -2.101409               | 4.397081  | -0.000487 |
| 15            | 6             | 0           | -0.968064               | -2.626177 | -0.000684 |

|    |   |   |           |           |           |
|----|---|---|-----------|-----------|-----------|
| 16 | 8 | 0 | -0.265151 | -3.611041 | -0.003081 |
| 17 | 8 | 0 | -2.306062 | -2.670568 | 0.002154  |
| 18 | 8 | 0 | -2.757961 | -4.017825 | 0.001835  |
| 19 | 1 | 0 | 4.846825  | 0.607831  | 0.001358  |
| 20 | 1 | 0 | -2.949882 | 3.892920  | -0.000451 |
| 21 | 1 | 0 | -1.897436 | -4.501155 | -0.000645 |

**Compound: P8**

| Center Number | Atomic Number | Atomic Type | Coordinates (Angstroms) |           |           |
|---------------|---------------|-------------|-------------------------|-----------|-----------|
|               |               |             | X                       | Y         | Z         |
| 1             | 7             | 0           | 1.306964                | 0.751753  | 0.034348  |
| 2             | 6             | 0           | 0.277604                | 1.576174  | 0.003442  |
| 3             | 6             | 0           | 0.942733                | -0.532548 | 0.012388  |
| 4             | 7             | 0           | -1.007778               | 1.284671  | -0.019188 |
| 5             | 7             | 0           | -0.309652               | -0.983952 | 0.014379  |
| 6             | 6             | 0           | -1.238471               | -0.030058 | 0.013731  |
| 7             | 6             | 0           | 2.021155                | -1.587527 | -0.004898 |
| 8             | 8             | 0           | 1.822987                | -2.779503 | 0.045556  |
| 9             | 8             | 0           | 3.238123                | -1.037611 | -0.088019 |
| 10            | 8             | 0           | 4.239744                | -2.044567 | -0.106679 |
| 11            | 6             | 0           | -2.692043               | -0.432692 | 0.051858  |
| 12            | 8             | 0           | -3.618436               | 0.336659  | 0.165107  |
| 13            | 8             | 0           | -2.833469               | -1.758546 | -0.056474 |
| 14            | 8             | 0           | -4.207434               | -2.117185 | -0.018138 |
| 15            | 7             | 0           | 0.613381                | 3.030669  | -0.007165 |
| 16            | 8             | 0           | 0.003081                | 3.709644  | -0.810326 |
| 17            | 8             | 0           | 1.462528                | 3.384597  | 0.788118  |
| 18            | 1             | 0           | 3.686310                | -2.859367 | -0.047961 |
| 19            | 1             | 0           | -4.629568               | -1.230624 | 0.079048  |

**Compound: P9**

| Center Number | Atomic Number | Atomic Type | Coordinates (Angstroms) |           |           |
|---------------|---------------|-------------|-------------------------|-----------|-----------|
|               |               |             | X                       | Y         | Z         |
| 1             | 7             | 0           | -0.554728               | 1.001262  | 0.024070  |
| 2             | 6             | 0           | 0.748189                | 1.201400  | -0.007436 |
| 3             | 6             | 0           | -0.889465               | -0.290894 | 0.020414  |
| 4             | 7             | 0           | 1.713587                | 0.298679  | -0.002951 |
| 5             | 7             | 0           | -0.032504               | -1.313446 | 0.003396  |
| 6             | 6             | 0           | 1.229231                | -0.931685 | 0.011665  |
| 7             | 6             | 0           | -2.351192               | -0.661920 | 0.046018  |
| 8             | 8             | 0           | -2.773769               | -1.784193 | 0.199082  |

|    |   |   |           |           |           |
|----|---|---|-----------|-----------|-----------|
| 9  | 8 | 0 | -3.126445 | 0.413547  | -0.126959 |
| 10 | 8 | 0 | -4.498641 | 0.049468  | -0.104344 |
| 11 | 7 | 0 | 2.243886  | -2.024833 | 0.035272  |
| 12 | 8 | 0 | 3.158426  | -1.877818 | 0.822868  |
| 13 | 8 | 0 | 2.048464  | -2.945016 | -0.734200 |
| 14 | 7 | 0 | 1.192746  | 2.625323  | -0.047550 |
| 15 | 8 | 0 | 2.088270  | 2.875799  | -0.830771 |
| 16 | 8 | 0 | 0.612710  | 3.382466  | 0.705691  |
| 17 | 1 | 0 | -4.433620 | -0.924327 | 0.039446  |

**Compound: P10**

| Center Number | Atomic Number | Atomic Type | Coordinates (Angstroms) |           |           |
|---------------|---------------|-------------|-------------------------|-----------|-----------|
|               |               |             | X                       | Y         | Z         |
| 1             | 7             | 0           | 0.208000                | 1.355700  | -0.000192 |
| 2             | 6             | 0           | 1.179058                | 0.459088  | 0.000133  |
| 3             | 6             | 0           | -0.987227               | 0.791566  | -0.000010 |
| 4             | 7             | 0           | 1.070043                | -0.858108 | 0.000512  |
| 5             | 7             | 0           | -1.278095               | -0.497728 | -0.000024 |
| 6             | 6             | 0           | -0.191921               | -1.250787 | 0.000159  |
| 7             | 7             | 0           | -2.150446               | 1.724652  | 0.000125  |
| 8             | 8             | 0           | -3.052380               | 1.441034  | -0.763169 |
| 9             | 8             | 0           | -2.068968               | 2.666663  | 0.763360  |
| 10            | 7             | 0           | 2.568456                | 1.000148  | -0.000058 |
| 11            | 8             | 0           | 2.774920                | 1.918922  | -0.768030 |
| 12            | 8             | 0           | 3.342141                | 0.463103  | 0.767748  |
| 13            | 7             | 0           | -0.418052               | -2.724839 | -0.000091 |
| 14            | 8             | 0           | -1.277466               | -3.125294 | 0.759892  |
| 15            | 8             | 0           | 0.281904                | -3.364176 | -0.760250 |

**Compound: P11**

| Center Number | Atomic Number | Atomic Type | Coordinates (Angstroms) |           |           |
|---------------|---------------|-------------|-------------------------|-----------|-----------|
|               |               |             | X                       | Y         | Z         |
| 1             | 7             | 0           | 0.786451                | -1.110425 | -0.000704 |
| 2             | 7             | 0           | -0.518415               | -1.262996 | -0.000709 |
| 3             | 6             | 0           | 1.254142                | 0.144098  | -0.000173 |
| 4             | 6             | 0           | -1.254142               | -0.144098 | -0.000171 |
| 5             | 7             | 0           | 0.518415                | 1.262996  | 0.000136  |
| 6             | 7             | 0           | -0.786451               | 1.110425  | 0.000166  |
| 7             | 6             | 0           | 2.741850                | 0.352208  | -0.000079 |
| 8             | 8             | 0           | 3.290029                | 1.430940  | -0.000391 |
| 9             | 8             | 0           | 3.399936                | -0.814203 | 0.000436  |
| 10            | 8             | 0           | 4.803808                | -0.592494 | 0.000564  |
| 11            | 6             | 0           | -2.741850               | -0.352207 | 0.000072  |
| 12            | 8             | 0           | -3.290028               | -1.430940 | 0.000391  |



|    |   |   |           |           |           |
|----|---|---|-----------|-----------|-----------|
| 13 | 8 | 0 | -3.399935 | 0.814203  | -0.000085 |
| 14 | 8 | 0 | -4.803809 | 0.592494  | 0.000253  |
| 15 | 1 | 0 | 4.835756  | 0.393793  | 0.000134  |
| 16 | 1 | 0 | -4.835756 | -0.393793 | 0.000402  |

**Compound: P12**

| Center Number | Atomic Number | Atomic Type | Coordinates (Angstroms) |           |           |
|---------------|---------------|-------------|-------------------------|-----------|-----------|
|               |               |             | X                       | Y         | Z         |
| 1             | 7             | 0           | 0.119452                | 1.303518  | 0.169762  |
| 2             | 7             | 0           | -1.192174               | 1.215087  | 0.124749  |
| 3             | 6             | 0           | 0.806424                | 0.161387  | 0.027633  |
| 4             | 6             | 0           | -1.685351               | -0.011146 | -0.000885 |
| 5             | 7             | 0           | 0.284837                | -1.061858 | -0.130549 |
| 6             | 7             | 0           | -1.027755               | -1.157911 | -0.115956 |
| 7             | 6             | 0           | 2.301896                | 0.303576  | 0.055823  |
| 8             | 8             | 0           | 2.892969                | 1.339939  | 0.254276  |
| 9             | 8             | 0           | 2.907675                | -0.868352 | -0.169546 |
| 10            | 8             | 0           | 4.319845                | -0.713336 | -0.139956 |
| 11            | 7             | 0           | -3.162481               | -0.111357 | -0.015393 |
| 12            | 8             | 0           | -3.640763               | -0.986815 | 0.680893  |
| 13            | 8             | 0           | -3.740918               | 0.692592  | -0.721758 |
| 14            | 1             | 0           | 4.398577                | 0.252534  | 0.045006  |

**Compound: P13**

| Center Number | Atomic Number | Atomic Type | Coordinates (Angstroms) |           |           |
|---------------|---------------|-------------|-------------------------|-----------|-----------|
|               |               |             | X                       | Y         | Z         |
| 1             | 7             | 0           | 0.658377                | 1.195840  | 0.026832  |
| 2             | 7             | 0           | -0.658379               | 1.195781  | -0.028238 |
| 3             | 6             | 0           | 1.235376                | 0.000063  | -0.000333 |
| 4             | 6             | 0           | -1.235310               | 0.000009  | -0.000381 |
| 5             | 7             | 0           | 0.658405                | -1.195770 | -0.028305 |
| 6             | 7             | 0           | -0.658266               | -1.195799 | 0.027010  |
| 7             | 7             | 0           | 2.716854                | 0.000086  | 0.000277  |
| 8             | 8             | 0           | 3.244804                | -0.759392 | -0.789019 |
| 9             | 8             | 0           | 3.244012                | 0.759503  | 0.790212  |
| 10            | 7             | 0           | -2.716925               | -0.000112 | 0.000225  |
| 11            | 8             | 0           | -3.243933               | -0.759186 | 0.790543  |

|    |   |   |           |          |           |
|----|---|---|-----------|----------|-----------|
| 12 | 8 | 0 | -3.244989 | 0.758996 | -0.789277 |
|----|---|---|-----------|----------|-----------|

**Compound: P14**

| Center Number | Atomic Number | Atomic Type | Coordinates (Angstroms) |           |           |
|---------------|---------------|-------------|-------------------------|-----------|-----------|
|               |               |             | X                       | Y         | Z         |
| 1             | 7             | 0           | -0.213999               | -0.593568 | -0.117241 |
| 2             | 7             | 0           | 0.213962                | 0.593546  | -0.117217 |
| 3             | 6             | 0           | 1.592277                | 0.689340  | -0.116190 |
| 4             | 7             | 0           | 2.149871                | 1.926149  | -0.123604 |
| 5             | 7             | 0           | 2.557972                | -0.219397 | -0.102826 |
| 6             | 7             | 0           | 3.474364                | 1.855418  | -0.128386 |
| 7             | 6             | 0           | 3.681633                | 0.534811  | -0.107947 |
| 8             | 6             | 0           | -1.592314               | -0.689361 | -0.116201 |
| 9             | 7             | 0           | -2.149909               | -1.926171 | -0.123663 |
| 10            | 7             | 0           | -2.558009               | 0.219375  | -0.102783 |
| 11            | 7             | 0           | -3.474402               | -1.855442 | -0.128414 |
| 12            | 6             | 0           | -3.681668               | -0.534835 | -0.107927 |
| 13            | 6             | 0           | -5.063640               | 0.019139  | -0.220900 |
| 14            | 8             | 0           | -5.266319               | 1.291957  | 0.219063  |
| 15            | 8             | 0           | -5.961154               | -0.559266 | -0.770042 |
| 16            | 8             | 0           | -4.330717               | 1.714993  | 1.225542  |
| 17            | 6             | 0           | 5.063606                | -0.019151 | -0.221005 |
| 18            | 8             | 0           | 5.266370                | -1.291932 | 0.219031  |
| 19            | 8             | 0           | 5.961101                | 0.559302  | -0.770126 |
| 20            | 8             | 0           | 4.330918                | -1.714929 | 1.225666  |
| 21            | 1             | 0           | 1.674001                | 2.818657  | -0.126376 |
| 22            | 1             | 0           | -1.674038               | -2.818679 | -0.126479 |
| 23            | 1             | 0           | -3.511955               | 1.831959  | 0.704747  |
| 24            | 1             | 0           | 3.512086                | -1.831946 | 0.704993  |

**Compound: P15**

| Center<br>Number | Atomic<br>Number | Atomic<br>Type | Coordinates (Angstroms) |           |           |
|------------------|------------------|----------------|-------------------------|-----------|-----------|
|                  |                  |                | X                       | Y         | Z         |
| 1                | 7                | 0              | -0.015482               | 0.711291  | 0.048310  |
| 2                | 7                | 0              | -0.498537               | -0.440927 | -0.121476 |
| 3                | 6                | 0              | -1.881789               | -0.468463 | -0.108835 |
| 4                | 7                | 0              | -2.497596               | -1.667647 | -0.286247 |
| 5                | 7                | 0              | -2.794652               | 0.480767  | 0.049100  |
| 6                | 7                | 0              | -3.817745               | -1.532987 | -0.249132 |
| 7                | 6                | 0              | -3.928826               | -0.222240 | -0.045393 |
| 8                | 6                | 0              | 1.364830                | 0.749323  | 0.038242  |
| 9                | 7                | 0              | 1.971393                | 1.950105  | 0.213021  |
| 10               | 7                | 0              | 2.293237                | -0.186532 | -0.108141 |
| 11               | 7                | 0              | 3.291055                | 1.831183  | 0.173084  |
| 12               | 6                | 0              | 3.445846                | 0.516286  | -0.016622 |
| 13               | 6                | 0              | 4.802910                | -0.064574 | -0.241124 |
| 14               | 8                | 0              | 4.959115                | -1.398299 | -0.014033 |
| 15               | 8                | 0              | 5.716515                | 0.559686  | -0.707248 |
| 16               | 8                | 0              | 4.020186                | -1.942175 | 0.929297  |
| 17               | 7                | 0              | -5.248430               | 0.397873  | 0.066991  |
| 18               | 8                | 0              | -5.267174               | 1.602733  | 0.249312  |
| 19               | 8                | 0              | -6.209941               | -0.347010 | -0.031900 |
| 20               | 1                | 0              | -2.069267               | -2.572797 | -0.432371 |
| 21               | 1                | 0              | 1.529351                | 2.848451  | 0.359093  |
| 22               | 1                | 0              | 3.189780                | -1.939005 | 0.413688  |

**Compound: P16**

| Center<br>Number | Atomic<br>Number | Atomic<br>Type | Coordinates (Angstroms) |           |           |
|------------------|------------------|----------------|-------------------------|-----------|-----------|
|                  |                  |                | X                       | Y         | Z         |
| 1                | 7                | 0              | -0.269437               | -0.569353 | -0.000091 |

|    |   |   |           |           |           |
|----|---|---|-----------|-----------|-----------|
| 2  | 7 | 0 | 0.269439  | 0.569353  | 0.000128  |
| 3  | 6 | 0 | 1.651921  | 0.532961  | -0.000085 |
| 4  | 7 | 0 | 2.317706  | 1.718304  | -0.000052 |
| 5  | 7 | 0 | 2.523768  | -0.466900 | -0.000580 |
| 6  | 7 | 0 | 3.630278  | 1.524850  | -0.000431 |
| 7  | 6 | 0 | 3.686386  | 0.194398  | -0.000186 |
| 8  | 6 | 0 | -1.651920 | -0.532961 | 0.000124  |
| 9  | 7 | 0 | -2.317705 | -1.718304 | 0.000090  |
| 10 | 7 | 0 | -2.523767 | 0.466899  | 0.000623  |
| 11 | 7 | 0 | -3.630277 | -1.524850 | 0.000475  |
| 12 | 6 | 0 | -3.686385 | -0.194398 | 0.000235  |
| 13 | 7 | 0 | 4.978748  | -0.489866 | 0.000139  |
| 14 | 8 | 0 | 4.946631  | -1.708225 | -0.000233 |
| 15 | 8 | 0 | 5.970958  | 0.220466  | 0.000584  |
| 16 | 7 | 0 | -4.978749 | 0.489866  | -0.000061 |
| 17 | 8 | 0 | -4.946638 | 1.708226  | 0.000154  |
| 18 | 8 | 0 | -5.970959 | -0.220465 | -0.000784 |
| 19 | 1 | 0 | 1.925726  | 2.651653  | 0.000152  |
| 20 | 1 | 0 | -1.925724 | -2.651653 | -0.000116 |

**Compound: P17**

| Center Number | Atomic Number | Atomic Type | Coordinates (Angstroms) |           |           |
|---------------|---------------|-------------|-------------------------|-----------|-----------|
|               |               |             | X                       | Y         | Z         |
| 1             | 7             | 0           | 1.958197                | -1.369302 | -0.039075 |
| 2             | 6             | 0           | 2.467571                | -0.103338 | 0.096149  |
| 3             | 7             | 0           | 3.765140                | -0.188943 | -0.029051 |
| 4             | 7             | 0           | 2.986597                | -2.224137 | -0.259600 |
| 5             | 7             | 0           | 4.045336                | -1.512324 | -0.252111 |
| 6             | 6             | 0           | 1.697319                | 1.111402  | 0.519764  |
| 7             | 8             | 0           | 1.038613                | 1.166502  | 1.520520  |
| 8             | 8             | 0           | 1.885700                | 2.069258  | -0.405399 |
| 9             | 8             | 0           | 1.299482                | 3.304111  | 0.004875  |
| 10            | 7             | 0           | 0.698897                | -1.888722 | -0.051983 |
| 11            | 7             | 0           | -0.135277               | -0.967876 | -0.092839 |
| 12            | 7             | 0           | -1.424430               | -1.404867 | -0.068756 |
| 13            | 7             | 0           | -1.865523               | -2.682608 | -0.015719 |
| 14            | 7             | 0           | -3.145431               | -2.604080 | 0.051690  |
| 15            | 6             | 0           | -2.503178               | -0.573462 | -0.009242 |
| 16            | 7             | 0           | -3.580109               | -1.313307 | 0.067265  |
| 17            | 6             | 0           | -2.488681               | 0.908183  | 0.003845  |
| 18            | 8             | 0           | -3.235668               | 1.612989  | 0.635275  |
| 19            | 8             | 0           | -1.526649               | 1.390681  | -0.811107 |
| 20            | 8             | 0           | -1.499065               | 2.814661  | -0.750679 |
| 21            | 1             | 0           | 0.367771                | 3.179863  | -0.273694 |
| 22            | 1             | 0           | -2.229041               | 2.990980  | -0.106012 |

**Compound: P18**

| Center Number | Atomic Number | Atomic Type | Coordinates (Angstroms) |           |           |
|---------------|---------------|-------------|-------------------------|-----------|-----------|
|               |               |             | X                       | Y         | Z         |
| 1             | 7             | 0           | 1.605297                | -1.431905 | -0.075515 |

|    |   |   |           |           |           |
|----|---|---|-----------|-----------|-----------|
| 2  | 6 | 0 | 2.377364  | -0.302153 | 0.002164  |
| 3  | 7 | 0 | 3.617259  | -0.659144 | -0.220079 |
| 4  | 7 | 0 | 2.413821  | -2.478520 | -0.361441 |
| 5  | 7 | 0 | 3.597210  | -2.003472 | -0.450689 |
| 6  | 6 | 0 | 1.948315  | 1.041815  | 0.461612  |
| 7  | 8 | 0 | 1.150750  | 1.261529  | 1.347051  |
| 8  | 8 | 0 | 2.610582  | 1.986444  | -0.206964 |
| 9  | 8 | 0 | 2.281768  | 3.281163  | 0.280599  |
| 10 | 7 | 0 | 0.271591  | -1.707174 | 0.019098  |
| 11 | 7 | 0 | -0.398331 | -0.665994 | -0.086686 |
| 12 | 7 | 0 | -1.733924 | -0.906159 | 0.056303  |
| 13 | 7 | 0 | -2.316708 | -2.061599 | 0.467497  |
| 14 | 7 | 0 | -3.573682 | -1.814591 | 0.535464  |
| 15 | 6 | 0 | -2.718505 | 0.019387  | -0.082151 |
| 16 | 7 | 0 | -3.864099 | -0.523578 | 0.202034  |
| 17 | 7 | 0 | -2.523034 | 1.388705  | -0.539426 |
| 18 | 8 | 0 | -1.636007 | 1.554692  | -1.362602 |
| 19 | 8 | 0 | -3.273193 | 2.219518  | -0.069412 |
| 20 | 1 | 0 | 1.617963  | 3.062964  | 0.974956  |

**Compound: P19**

| Center Number | Atomic Number | Atomic Type | Coordinates (Angstroms) |           |           |
|---------------|---------------|-------------|-------------------------|-----------|-----------|
|               |               |             | X                       | Y         | Z         |
| 1             | 7             | 0           | 3.170394                | -2.025745 | 0.523449  |
| 2             | 7             | 0           | 1.892484                | -2.093588 | 0.448986  |
| 3             | 7             | 0           | 3.640941                | -0.784956 | 0.202043  |
| 4             | 7             | 0           | 1.479016                | -0.862246 | 0.049563  |
| 5             | 6             | 0           | 2.584976                | -0.081838 | -0.075602 |
| 6             | 7             | 0           | 0.189685                | -0.441106 | -0.083338 |
| 7             | 7             | 0           | -0.609391               | -1.393348 | -0.066425 |
| 8             | 7             | 0           | -1.894607               | -0.935196 | -0.140950 |
| 9             | 7             | 0           | -2.838427               | -1.817912 | -0.548602 |
| 10            | 6             | 0           | -2.515890               | 0.264894  | 0.048373  |
| 11            | 7             | 0           | -3.942460               | -1.172625 | -0.586784 |
| 12            | 7             | 0           | -3.781975               | 0.130382  | -0.210945 |
| 13            | 7             | 0           | 2.585354                | 1.303163  | -0.529755 |
| 14            | 8             | 0           | 3.458470                | 2.012915  | -0.075789 |
| 15            | 8             | 0           | 1.716557                | 1.596203  | -1.336886 |
| 16            | 7             | 0           | -1.925057               | 1.466222  | 0.625539  |
| 17            | 8             | 0           | -1.225635               | 1.284535  | 1.610335  |
| 18            | 8             | 0           | -2.221418               | 2.517639  | 0.100329  |

**Compound: P20**

| Center<br>Number | Atomic<br>Number | Atomic<br>Type | Coordinates (Angstroms) |           |           |
|------------------|------------------|----------------|-------------------------|-----------|-----------|
|                  |                  |                | X                       | Y         | Z         |
| 1                | 7                | 0              | -2.487228               | -1.335900 | -0.176968 |
| 2                | 6                | 0              | -3.793078               | -1.111586 | -0.049934 |
| 3                | 6                | 0              | -1.756774               | -0.225038 | -0.182514 |
| 4                | 7                | 0              | -4.382387               | 0.082091  | 0.012672  |
| 5                | 7                | 0              | -2.208105               | 1.026166  | -0.121648 |
| 6                | 6                | 0              | -3.535273               | 1.108012  | -0.039647 |
| 7                | 7                | 0              | -0.357862               | -0.442130 | -0.361470 |
| 8                | 7                | 0              | 0.339588                | 0.249065  | 0.399388  |
| 9                | 6                | 0              | 1.738803                | 0.032415  | 0.219647  |
| 10               | 6                | 0              | 3.774638                | 0.925894  | 0.088436  |
| 11               | 7                | 0              | 2.468757                | 1.144760  | 0.224493  |
| 12               | 7                | 0              | 4.364377                | -0.266568 | 0.012267  |
| 13               | 6                | 0              | 3.518417                | -1.293796 | 0.062661  |
| 14               | 7                | 0              | 2.191198                | -1.216665 | 0.148272  |
| 15               | 6                | 0              | -4.167538               | 2.477312  | 0.012977  |
| 16               | 8                | 0              | -5.334459               | 2.694340  | 0.247495  |
| 17               | 8                | 0              | -3.271576               | 3.439417  | -0.241307 |
| 18               | 8                | 0              | -3.889397               | 4.718544  | -0.193727 |
| 19               | 6                | 0              | -4.659448               | -2.345455 | 0.014299  |
| 20               | 8                | 0              | -4.245643               | -3.482197 | 0.046891  |
| 21               | 8                | 0              | -5.960724               | -2.030735 | 0.030805  |
| 22               | 8                | 0              | -6.754540               | -3.207967 | 0.091672  |
| 23               | 6                | 0              | 4.700868                | 2.115613  | 0.029522  |
| 24               | 8                | 0              | 5.905892                | 2.052793  | -0.060039 |
| 25               | 8                | 0              | 4.021935                | 3.268550  | 0.085022  |
| 26               | 8                | 0              | 4.914325                | 4.373047  | 0.025010  |
| 27               | 6                | 0              | 4.083901                | -2.692658 | 0.024150  |
| 28               | 8                | 0              | 3.441769                | -3.704449 | 0.192489  |
| 29               | 8                | 0              | 5.399555                | -2.683053 | -0.223522 |

|    |   |   |           |           |           |
|----|---|---|-----------|-----------|-----------|
| 30 | 8 | 0 | 5.907784  | -4.009948 | -0.256066 |
| 31 | 1 | 0 | -4.818425 | 4.466097  | 0.023724  |
| 32 | 1 | 0 | -6.053156 | -3.902319 | 0.101455  |
| 33 | 1 | 0 | 5.781122  | 3.905686  | -0.041552 |
| 34 | 1 | 0 | 5.085630  | -4.526206 | -0.078033 |

**Compound: P21**

| Center Number | Atomic Number | Atomic Type | Coordinates (Angstroms) |           |           |
|---------------|---------------|-------------|-------------------------|-----------|-----------|
|               |               |             | X                       | Y         | Z         |
| 1             | 7             | 0           | 0.164197                | -0.524247 | 0.171037  |
| 2             | 7             | 0           | -0.494754               | 0.102659  | -0.675921 |
| 3             | 6             | 0           | -1.899864               | -0.063764 | -0.518716 |
| 4             | 7             | 0           | -2.428671               | 0.055364  | 0.696960  |
| 5             | 7             | 0           | -2.566720               | -0.248716 | -1.659024 |
| 6             | 6             | 0           | -3.757730               | -0.010032 | 0.714087  |
| 7             | 6             | 0           | -3.870052               | -0.306738 | -1.474757 |
| 8             | 7             | 0           | -4.547072               | -0.180468 | -0.349484 |
| 9             | 6             | 0           | 1.566425                | -0.275755 | 0.073745  |
| 10            | 7             | 0           | 2.327491                | -1.354878 | 0.224653  |
| 11            | 7             | 0           | 1.982847                | 0.980104  | -0.072082 |
| 12            | 6             | 0           | 3.632403                | -1.094521 | 0.176551  |
| 13            | 6             | 0           | 3.309161                | 1.104823  | -0.059059 |
| 14            | 7             | 0           | 4.187722                | 0.110229  | 0.050525  |
| 15            | 6             | 0           | 3.901800                | 2.486760  | -0.188865 |
| 16            | 8             | 0           | 5.082698                | 2.728786  | -0.289863 |
| 17            | 8             | 0           | 2.950620                | 3.429419  | -0.174983 |
| 18            | 8             | 0           | 3.530079                | 4.721662  | -0.293872 |
| 19            | 6             | 0           | 4.537610                | -2.296555 | 0.289713  |
| 20            | 8             | 0           | 4.160326                | -3.445495 | 0.335706  |
| 21            | 8             | 0           | 5.826166                | -1.937279 | 0.333760  |
| 22            | 8             | 0           | 6.657952                | -3.084451 | 0.440247  |
| 23            | 6             | 0           | -4.401304               | 0.133111  | 2.071280  |
| 24            | 8             | 0           | -3.815836               | 0.437063  | 3.085254  |
| 25            | 8             | 0           | -5.712951               | -0.124977 | 2.018047  |
| 26            | 8             | 0           | -6.299811               | 0.009593  | 3.304760  |
| 27            | 7             | 0           | -4.688321               | -0.530202 | -2.705135 |
| 28            | 8             | 0           | -5.701223               | 0.135873  | -2.798531 |
| 29            | 8             | 0           | -4.256063               | -1.355682 | -3.486957 |

|    |   |   |           |           |           |
|----|---|---|-----------|-----------|-----------|
| 30 | 1 | 0 | 4.487663  | 4.489806  | -0.351920 |
| 31 | 1 | 0 | 5.981580  | -3.803085 | 0.446318  |
| 32 | 1 | 0 | -5.512622 | 0.264281  | 3.842478  |

| <b>Compound: P22</b> |               |             |                         |           |           |  |
|----------------------|---------------|-------------|-------------------------|-----------|-----------|--|
| Center Number        | Atomic Number | Atomic Type | Coordinates (Angstroms) |           |           |  |
|                      |               |             | X                       | Y         | Z         |  |
| 1                    | 7             | 0           | 0.069659                | -0.548482 | -0.339458 |  |
| 2                    | 7             | 0           | 0.793056                | 0.066227  | 0.462391  |  |
| 3                    | 6             | 0           | 2.180358                | -0.108714 | 0.212106  |  |
| 4                    | 7             | 0           | 2.634498                | 0.043723  | -1.033525 |  |
| 5                    | 7             | 0           | 2.922264                | -0.334849 | 1.296909  |  |
| 6                    | 6             | 0           | 3.950912                | 0.016629  | -1.101531 |  |
| 7                    | 6             | 0           | 4.212582                | -0.367263 | 1.035486  |  |
| 8                    | 7             | 0           | 4.819601                | -0.158477 | -0.120992 |  |
| 9                    | 6             | 0           | -1.320219               | -0.282444 | -0.142355 |  |
| 10                   | 7             | 0           | -2.103894               | -1.349460 | -0.252036 |  |
| 11                   | 7             | 0           | -1.705950               | 0.976750  | 0.047804  |  |
| 12                   | 6             | 0           | -3.398821               | -1.072387 | -0.108934 |  |
| 13                   | 6             | 0           | -3.028235               | 1.119972  | 0.129287  |  |
| 14                   | 7             | 0           | -3.925885               | 0.138351  | 0.069516  |  |
| 15                   | 6             | 0           | -3.590138               | 2.508050  | 0.317576  |  |
| 16                   | 8             | 0           | -4.757996               | 2.764968  | 0.499190  |  |
| 17                   | 8             | 0           | -2.627044               | 3.436442  | 0.255839  |  |
| 18                   | 8             | 0           | -3.175988               | 4.735220  | 0.432568  |  |
| 19                   | 6             | 0           | -4.326631               | -2.260917 | -0.170210 |  |
| 20                   | 8             | 0           | -3.968933               | -3.414396 | -0.245713 |  |
| 21                   | 8             | 0           | -5.609611               | -1.882681 | -0.130143 |  |
| 22                   | 8             | 0           | -6.464119               | -3.016374 | -0.188013 |  |
| 23                   | 7             | 0           | 4.537358                | 0.209060  | -2.462744 |  |
| 24                   | 8             | 0           | 5.517720                | 0.925177  | -2.520813 |  |
| 25                   | 8             | 0           | 3.970925                | -0.369928 | -3.369511 |  |
| 26                   | 7             | 0           | 5.106036                | -0.658705 | 2.197073  |  |
| 27                   | 8             | 0           | 6.123754                | 0.002157  | 2.263276  |  |
| 28                   | 8             | 0           | 4.719674                | -1.527957 | 2.954647  |  |



|    |   |   |           |           |           |
|----|---|---|-----------|-----------|-----------|
| 29 | 1 | 0 | -4.131653 | 4.518040  | 0.548795  |
| 30 | 1 | 0 | -5.801458 | -3.745578 | -0.242506 |

**Compound: P23**

| Center<br>Number | Atomic<br>Number | Atomic<br>Type | Coordinates (Angstroms) |           |           |
|------------------|------------------|----------------|-------------------------|-----------|-----------|
|                  |                  |                | X                       | Y         | Z         |
| 1                | 7                | 0              | -0.473115               | 0.006175  | -0.439620 |
| 2                | 7                | 0              | 0.322679                | -0.225985 | 0.485716  |
| 3                | 6                | 0              | 1.685911                | -0.167317 | 0.075520  |
| 4                | 7                | 0              | 2.490600                | 0.480317  | 0.912143  |
| 5                | 7                | 0              | 2.045289                | -0.814625 | -1.034298 |
| 6                | 6                | 0              | 3.770782                | 0.459858  | 0.551618  |
| 7                | 6                | 0              | 3.351629                | -0.800496 | -1.218244 |
| 8                | 7                | 0              | 4.275990                | -0.203157 | -0.492757 |
| 9                | 6                | 0              | -1.835399               | -0.150303 | -0.051411 |
| 10               | 7                | 0              | -2.184555               | -1.243192 | 0.628313  |
| 11               | 7                | 0              | -2.651970               | 0.803261  | -0.489226 |
| 12               | 6                | 0              | -3.490439               | -1.327896 | 0.799540  |
| 13               | 6                | 0              | -3.930335               | 0.606168  | -0.176195 |
| 14               | 7                | 0              | -4.424657               | -0.470249 | 0.440928  |
| 15               | 6                | 0              | -4.940122               | 1.662240  | -0.550985 |
| 16               | 8                | 0              | -6.115961               | 1.624065  | -0.270921 |
| 17               | 8                | 0              | -4.369805               | 2.660447  | -1.236046 |
| 18               | 8                | 0              | -5.334873               | 3.646028  | -1.575956 |
| 19               | 7                | 0              | 3.847085                | -1.557617 | -2.408555 |
| 20               | 8                | 0              | 3.188034                | -1.442182 | -3.424035 |
| 21               | 8                | 0              | 4.857154                | -2.212501 | -2.237490 |
| 22               | 7                | 0              | -3.971771               | -2.559245 | 1.497261  |
| 23               | 8                | 0              | -4.965896               | -3.079647 | 1.029176  |
| 24               | 8                | 0              | -3.318105               | -2.914603 | 2.459282  |
| 25               | 6                | 0              | 4.711236                | 1.246718  | 1.430343  |
| 26               | 8                | 0              | 4.376579                | 1.888430  | 2.399561  |
| 27               | 8                | 0              | 5.974177                | 1.151982  | 0.999727  |

|    |   |   |           |          |           |
|----|---|---|-----------|----------|-----------|
| 28 | 8 | 0 | 6.843392  | 1.902829 | 1.835136  |
| 29 | 1 | 0 | -6.149723 | 3.253344 | -1.181545 |
| 30 | 1 | 0 | 6.203567  | 2.264272 | 2.493619  |

**Compound: P24**

| Center<br>Number | Atomic<br>Number | Atomic<br>Type | Coordinates (Angstroms) |           |           |
|------------------|------------------|----------------|-------------------------|-----------|-----------|
|                  |                  |                | X                       | Y         | Z         |
| 1                | 7                | 0              | 2.273418                | -0.917732 | -0.478760 |
| 2                | 6                | 0              | 3.559183                | -0.648904 | -0.266088 |
| 3                | 6                | 0              | 1.451266                | 0.050999  | -0.090440 |
| 4                | 7                | 0              | 4.045982                | 0.501455  | 0.208000  |
| 5                | 7                | 0              | 1.794974                | 1.218081  | 0.455720  |
| 6                | 6                | 0              | 3.103978                | 1.362240  | 0.538760  |
| 7                | 7                | 0              | 0.074582                | -0.185436 | -0.379691 |
| 8                | 7                | 0              | -0.675564               | 0.120112  | 0.562211  |
| 9                | 6                | 0              | -2.054948               | -0.017551 | 0.242420  |
| 10               | 6                | 0              | -3.814868               | 0.418114  | -1.016608 |
| 11               | 7                | 0              | -2.504477               | 0.509613  | -0.897281 |
| 12               | 7                | 0              | -4.672006               | -0.169939 | -0.200848 |
| 13               | 6                | 0              | -4.068408               | -0.670585 | 0.864499  |
| 14               | 7                | 0              | -2.793162               | -0.599932 | 1.187059  |
| 15               | 6                | 0              | 4.525942                | -1.751622 | -0.619934 |
| 16               | 8                | 0              | 4.207646                | -2.837025 | -1.048371 |
| 17               | 8                | 0              | 5.790956                | -1.380657 | -0.394465 |
| 18               | 8                | 0              | 6.686002                | -2.431983 | -0.726828 |
| 19               | 7                | 0              | 3.579216                | 2.670634  | 1.083472  |
| 20               | 8                | 0              | 4.534317                | 3.165112  | 0.516562  |
| 21               | 8                | 0              | 2.960180                | 3.105499  | 2.035525  |
| 22               | 7                | 0              | -4.406858               | 1.052448  | -2.233233 |
| 23               | 8                | 0              | -3.787220               | 0.897448  | -3.267379 |
| 24               | 8                | 0              | -5.445455               | 1.659680  | -2.058893 |
| 25               | 7                | 0              | -4.950323               | -1.392535 | 1.829514  |
| 26               | 8                | 0              | -5.784179               | -2.124839 | 1.332749  |

|    |   |   |           |           |           |
|----|---|---|-----------|-----------|-----------|
| 27 | 8 | 0 | -4.740778 | -1.175501 | 3.006748  |
| 28 | 1 | 0 | 6.054898  | -3.125394 | -1.033984 |

| <b>Compound: P25</b> |               |             |                         |           |           |
|----------------------|---------------|-------------|-------------------------|-----------|-----------|
| Center Number        | Atomic Number | Atomic Type | Coordinates (Angstroms) |           |           |
|                      |               |             | X                       | Y         | Z         |
| 1                    | 7             | 0           | 2.212233                | 1.106485  | 0.050319  |
| 2                    | 6             | 0           | 3.529367                | 1.157375  | -0.006765 |
| 3                    | 6             | 0           | 1.751494                | -0.141912 | 0.134975  |
| 4                    | 7             | 0           | 4.388879                | 0.153216  | -0.009490 |
| 5                    | 7             | 0           | 2.480621                | -1.256504 | 0.102106  |
| 6                    | 6             | 0           | 3.772807                | -1.017027 | 0.004204  |
| 7                    | 7             | 0           | 0.361412                | -0.352519 | 0.361858  |
| 8                    | 7             | 0           | -0.361355               | 0.351971  | -0.361996 |
| 9                    | 6             | 0           | -1.751451               | 0.141429  | -0.134975 |
| 10                   | 6             | 0           | -3.772634               | 1.017024  | -0.004904 |
| 11                   | 7             | 0           | -2.480415               | 1.256131  | -0.103142 |
| 12                   | 7             | 0           | -4.388902               | -0.153107 | 0.009737  |
| 13                   | 6             | 0           | -3.529533               | -1.157400 | 0.007774  |
| 14                   | 7             | 0           | -2.212412               | -1.106808 | -0.049306 |
| 15                   | 7             | 0           | -4.125927               | -2.523721 | 0.079162  |
| 16                   | 8             | 0           | -3.591044               | -3.292795 | 0.854015  |
| 17                   | 8             | 0           | -5.081520               | -2.722242 | -0.645001 |
| 18                   | 7             | 0           | -4.653178               | 2.219293  | 0.082709  |
| 19                   | 8             | 0           | -4.266648               | 3.100762  | 0.825627  |
| 20                   | 8             | 0           | -5.661155               | 2.189179  | -0.595162 |
| 21                   | 7             | 0           | 4.653583                | -2.219105 | -0.084461 |
| 22                   | 8             | 0           | 5.661702                | -2.189240 | 0.593179  |
| 23                   | 8             | 0           | 4.267073                | -3.100139 | -0.827903 |
| 24                   | 7             | 0           | 4.125515                | 2.523914  | -0.077423 |
| 25                   | 8             | 0           | 3.588963                | 3.293945  | -0.850123 |

|    |   |   |          |          |          |
|----|---|---|----------|----------|----------|
| 26 | 8 | 0 | 5.082544 | 2.721576 | 0.645074 |
|----|---|---|----------|----------|----------|

**Compound: P26**

| Center Number | Atomic Number | Atomic Type | Coordinates (Angstroms) |           |           |
|---------------|---------------|-------------|-------------------------|-----------|-----------|
|               |               |             | X                       | Y         | Z         |
| 1             | 7             | 0           | -2.178856               | 1.072590  | 0.293902  |
| 2             | 7             | 0           | -3.478724               | 1.225058  | 0.215769  |
| 3             | 6             | 0           | -1.721981               | -0.189944 | 0.255179  |
| 4             | 6             | 0           | -4.221340               | 0.113745  | 0.127527  |
| 5             | 7             | 0           | -2.463582               | -1.304983 | 0.266251  |
| 6             | 7             | 0           | -3.764267               | -1.143146 | 0.194626  |
| 7             | 7             | 0           | -0.328249               | -0.416446 | 0.329471  |
| 8             | 7             | 0           | 0.328238                | 0.416648  | -0.329079 |
| 9             | 6             | 0           | 1.721969                | 0.190067  | -0.254882 |
| 10            | 6             | 0           | -5.697963               | 0.334338  | -0.016473 |
| 11            | 8             | 0           | -6.236594               | 1.417384  | -0.058242 |
| 12            | 8             | 0           | -6.361113               | -0.826414 | -0.105155 |
| 13            | 8             | 0           | -7.755664               | -0.591517 | -0.248899 |
| 14            | 7             | 0           | 3.764300                | 1.143170  | -0.194445 |
| 15            | 7             | 0           | 2.463611                | 1.305078  | -0.265884 |
| 16            | 6             | 0           | 4.221333                | -0.113746 | -0.127556 |
| 17            | 7             | 0           | 3.478658                | -1.225023 | -0.215790 |
| 18            | 7             | 0           | 2.178793                | -1.072482 | -0.293742 |
| 19            | 6             | 0           | 5.697981                | -0.334418 | 0.016076  |
| 20            | 8             | 0           | 6.236639                | -1.417480 | 0.057031  |
| 21            | 8             | 0           | 6.361112                | 0.826288  | 0.105520  |
| 22            | 8             | 0           | 7.755683                | 0.591322  | 0.248967  |
| 23            | 1             | 0           | -7.779070               | 0.395014  | -0.236084 |
| 24            | 1             | 0           | 7.779106                | -0.395199 | 0.235513  |

**Compound: P27**

| Center<br>Number | Atomic<br>Number | Atomic<br>Type | Coordinates (Angstroms) |           |           |
|------------------|------------------|----------------|-------------------------|-----------|-----------|
|                  |                  |                | X                       | Y         | Z         |
| 1                | 7                | 0              | 1.724886                | 1.023007  | -0.275026 |
| 2                | 7                | 0              | 3.025316                | 1.185246  | -0.224683 |
| 3                | 6                | 0              | 1.275954                | -0.238370 | -0.178189 |
| 4                | 6                | 0              | 3.774169                | 0.081293  | -0.101034 |
| 5                | 7                | 0              | 2.021334                | -1.349518 | -0.140762 |
| 6                | 7                | 0              | 3.322076                | -1.179544 | -0.095160 |
| 7                | 7                | 0              | -0.117569               | -0.471359 | -0.236187 |
| 8                | 7                | 0              | -0.773808               | 0.381250  | 0.396706  |
| 9                | 6                | 0              | -2.170254               | 0.220160  | 0.235418  |
| 10               | 7                | 0              | -4.190099               | 0.357266  | 1.232325  |
| 11               | 7                | 0              | -2.887574               | 0.500136  | 1.331859  |
| 12               | 6                | 0              | -4.647212               | 0.025415  | 0.029852  |
| 13               | 7                | 0              | -3.958951               | -0.160932 | -1.089257 |
| 14               | 7                | 0              | -2.650529               | -0.085638 | -0.979572 |
| 15               | 7                | 0              | -6.115081               | -0.131009 | -0.078315 |
| 16               | 8                | 0              | -6.647976               | -0.742074 | 0.829448  |
| 17               | 8                | 0              | -6.635009               | 0.363714  | -1.060542 |
| 18               | 6                | 0              | 5.252785                | 0.313857  | 0.002315  |
| 19               | 8                | 0              | 5.786896                | 1.399473  | -0.023493 |
| 20               | 8                | 0              | 5.921766                | -0.838647 | 0.138020  |
| 21               | 8                | 0              | 7.317931                | -0.593412 | 0.241472  |
| 22               | 1                | 0              | 7.338469                | 0.391107  | 0.177082  |

**Compound: P28**

| Center Number | Atomic Number | Atomic Type | Coordinates (Angstroms) |           |           |
|---------------|---------------|-------------|-------------------------|-----------|-----------|
|               |               |             | X                       | Y         | Z         |
| 1             | 7             | 0           | -2.449785               | 1.297179  | 0.585796  |
| 2             | 7             | 0           | -3.753073               | 1.128432  | 0.588655  |
| 3             | 6             | 0           | -1.722606               | 0.321022  | 0.026428  |
| 4             | 6             | 0           | -4.198782               | 0.042621  | -0.033908 |
| 5             | 7             | 0           | -2.190434               | -0.755477 | -0.623215 |
| 6             | 7             | 0           | -3.498109               | -0.884096 | -0.675474 |
| 7             | 7             | 0           | -0.325758               | 0.546981  | 0.056150  |
| 8             | 7             | 0           | 0.326000                | -0.505057 | 0.218196  |
| 9             | 6             | 0           | 1.721759                | -0.299709 | 0.124090  |
| 10            | 7             | 0           | 3.755144                | -0.946010 | 0.862251  |
| 11            | 7             | 0           | 2.449244                | -1.068545 | 0.945908  |
| 12            | 6             | 0           | 4.199087                | -0.051892 | -0.013278 |
| 13            | 7             | 0           | 3.495881                | 0.686560  | -0.863015 |
| 14            | 7             | 0           | 2.191205                | 0.538336  | -0.813964 |
| 15            | 7             | 0           | -5.667296               | -0.141816 | -0.031997 |
| 16            | 8             | 0           | -6.164910               | -0.479431 | -1.089350 |
| 17            | 8             | 0           | -6.221886               | 0.062578  | 1.031795  |
| 18            | 7             | 0           | 5.667537                | 0.127204  | -0.069306 |
| 19            | 8             | 0           | 6.331735                | -0.890712 | -0.025201 |
| 20            | 8             | 0           | 6.054981                | 1.277804  | -0.152230 |

**Compound: 1,2,4-Triazole**

| Center Number | Atomic Number | Atomic Type | Coordinates (Angstroms) |           |           |
|---------------|---------------|-------------|-------------------------|-----------|-----------|
|               |               |             | X                       | Y         | Z         |
| 1             | 6             | 0           | -0.865073               | 0.689544  | -0.000013 |
| 2             | 7             | 0           | -0.841222               | -0.657933 | 0.000012  |
| 3             | 7             | 0           | 0.367308                | 1.159734  | -0.000004 |
| 4             | 7             | 0           | 0.429903                | -1.110139 | 0.000010  |
| 5             | 6             | 0           | 1.114595                | 0.022621  | -0.000012 |
| 6             | 1             | 0           | -1.777124               | 1.270566  | -0.000015 |
| 7             | 1             | 0           | -1.607724               | -1.312560 | 0.000029  |
| 8             | 1             | 0           | 2.195792                | 0.027374  | 0.000002  |

**Compound: 1H-Tetrazole**

| Center Number | Atomic Number | Atomic Type | Coordinates (Angstroms) |           |           |
|---------------|---------------|-------------|-------------------------|-----------|-----------|
|               |               |             | X                       | Y         | Z         |
| 1             | 6             | 0           | -0.949072               | -0.539660 | 0.000302  |
| 2             | 7             | 0           | -0.704122               | 0.781569  | -0.000085 |
| 3             | 7             | 0           | 0.203034                | -1.171995 | -0.000687 |
| 4             | 7             | 0           | 0.627474                | 0.973139  | 0.000104  |
| 5             | 7             | 0           | 1.153501                | -0.203401 | 0.000403  |
| 6             | 1             | 0           | -1.931270               | -0.987063 | 0.000261  |
| 7             | 1             | 0           | -1.333503               | 1.569844  | -0.000217 |

**Compound: 1,3,5-Triazine**

| Center<br>Number | Atomic<br>Number | Atomic<br>Type | Coordinates (Angstroms) |           |           |
|------------------|------------------|----------------|-------------------------|-----------|-----------|
|                  |                  |                | X                       | Y         | Z         |
| 1                | 6                | 0              | 1.286103                | -0.115905 | 0.000004  |
| 2                | 7                | 0              | 0.577222                | -1.246316 | 0.000002  |
| 3                | 6                | 0              | -0.743429               | -1.055804 | 0.000018  |
| 4                | 6                | 0              | -0.542672               | 1.171706  | -0.000036 |
| 5                | 7                | 0              | 0.790765                | 1.123036  | -0.000001 |
| 6                | 1                | 0              | -1.370150               | -1.945904 | 0.000009  |
| 7                | 1                | 0              | 2.370325                | -0.213615 | 0.000006  |
| 8                | 1                | 0              | -1.000165               | 2.159507  | 0.000033  |
| 9                | 7                | 0              | -1.367991               | 0.123284  | 0.000004  |

**Compound: 1,2,4,5-Tetrazine**

| Center<br>Number | Atomic<br>Number | Atomic<br>Type | Coordinates (Angstroms) |           |           |
|------------------|------------------|----------------|-------------------------|-----------|-----------|
|                  |                  |                | X                       | Y         | Z         |
| 1                | 7                | 0              | 0.660133                | 1.193716  | 0.000007  |
| 2                | 7                | 0              | -0.660133               | 1.193716  | -0.000003 |
| 3                | 6                | 0              | 1.261922                | -0.000001 | 0.000016  |
| 4                | 6                | 0              | -1.261922               | -0.000001 | -0.000033 |
| 5                | 7                | 0              | 0.660135                | -1.193716 | 0.000007  |
| 6                | 7                | 0              | -0.660135               | -1.193716 | -0.000003 |
| 7                | 1                | 0              | 2.347913                | 0.000001  | 0.000002  |
| 8                | 1                | 0              | -2.347913               | 0.000001  | 0.000042  |

**Compound: CH<sub>3</sub>N=NCH<sub>3</sub>**

| Center<br>Number | Atomic<br>Number | Atomic<br>Type | Coordinates (Angstroms) |           |           |
|------------------|------------------|----------------|-------------------------|-----------|-----------|
|                  |                  |                | X                       | Y         | Z         |
| 1                | 7                | 0              | 0.426056                | 0.451750  | -0.000017 |
| 2                | 7                | 0              | -0.426056               | -0.451750 | -0.000014 |
| 3                | 6                | 0              | -1.789579               | 0.069354  | 0.000021  |
| 4                | 6                | 0              | 1.789579                | -0.069354 | -0.000007 |
| 5                | 1                | 0              | -2.304719               | -0.328814 | -0.880891 |
| 6                | 1                | 0              | -2.305000               | -0.329579 | 0.880413  |
| 7                | 1                | 0              | -1.820940               | 1.164293  | 0.000444  |
| 8                | 1                | 0              | 2.305095                | 0.329728  | -0.880273 |
| 9                | 1                | 0              | 2.304624                | 0.328665  | 0.881031  |

|    |   |   |          |           |           |
|----|---|---|----------|-----------|-----------|
| 10 | 1 | 0 | 1.820941 | -1.164293 | -0.000588 |
|----|---|---|----------|-----------|-----------|

**Compound: H<sub>2</sub>NN=NNH<sub>2</sub>**

| Center Number | Atomic Number | Atomic Type | Coordinates (Angstroms) |           |           |
|---------------|---------------|-------------|-------------------------|-----------|-----------|
|               |               |             | X                       | Y         | Z         |
| 1             | 7             | 0           | 0.435104                | -0.446369 | -0.011221 |
| 2             | 7             | 0           | -0.435104               | 0.446376  | 0.011825  |
| 3             | 7             | 0           | -1.707328               | -0.067866 | 0.105566  |
| 4             | 7             | 0           | 1.707278                | 0.067818  | -0.105972 |
| 5             | 1             | 0           | -1.764228               | -1.031990 | -0.219129 |
| 6             | 1             | 0           | -2.343935               | 0.542780  | -0.389884 |
| 7             | 1             | 0           | 1.764366                | 1.032095  | 0.218221  |
| 8             | 1             | 0           | 2.344152                | -0.542598 | 0.389409  |

**Compound: CH<sub>3</sub>C(O)OOH**

| Center Number | Atomic Number | Atomic Type | Coordinates (Angstroms) |           |           |
|---------------|---------------|-------------|-------------------------|-----------|-----------|
|               |               |             | X                       | Y         | Z         |
| 1             | 6             | 0           | -0.535942               | 1.370335  | 0.011595  |
| 2             | 6             | 0           | -0.590923               | -0.128372 | 0.003159  |
| 3             | 8             | 0           | 0.600779                | -0.811659 | -0.027726 |
| 4             | 8             | 0           | -1.581605               | -0.810222 | 0.010860  |
| 5             | 8             | 0           | 1.732052                | 0.085641  | -0.068335 |
| 6             | 1             | 0           | 0.030202                | 1.732465  | 0.873040  |
| 7             | 1             | 0           | -0.028917               | 1.742624  | -0.882400 |
| 8             | 1             | 0           | -1.559598               | 1.740907  | 0.045822  |
| 9             | 1             | 0           | 2.309695                | -0.377851 | 0.556616  |

**Compound: CH<sub>3</sub>NO<sub>2</sub>**

| Center Number | Atomic Number | Atomic Type | Coordinates (Angstroms) |           |           |
|---------------|---------------|-------------|-------------------------|-----------|-----------|
|               |               |             | X                       | Y         | Z         |
| 1             | 6             | 0           | 1.318762                | -0.004306 | -0.002832 |
| 2             | 7             | 0           | -0.173357               | 0.000026  | -0.010696 |
| 3             | 8             | 0           | -0.732425               | -1.085988 | 0.002929  |
| 4             | 8             | 0           | -0.723704               | 1.090529  | 0.002895  |
| 5             | 1             | 0           | 1.629734                | 0.032830  | 1.043327  |
| 6             | 1             | 0           | 1.658257                | -0.927675 | -0.468199 |
| 7             | 1             | 0           | 1.661970                | 0.884168  | -0.529851 |



| <b>Compound: CH<sub>4</sub></b> |               |             |                         |           |           |  |
|---------------------------------|---------------|-------------|-------------------------|-----------|-----------|--|
| Center Number                   | Atomic Number | Atomic Type | Coordinates (Angstroms) |           |           |  |
|                                 |               |             | X                       | Y         | Z         |  |
| 1                               | 6             | 0           | -0.000003               | -0.000003 | 0.000004  |  |
| 2                               | 1             | 0           | 0.715278                | 0.350084  | 0.745724  |  |
| 3                               | 1             | 0           | -0.866418               | -0.432945 | 0.502168  |  |
| 4                               | 1             | 0           | 0.471432                | -0.756563 | -0.629007 |  |
| 5                               | 1             | 0           | -0.320275               | 0.839440  | -0.618911 |  |

| <b>Compound: NH<sub>3</sub></b> |               |             |                         |           |           |  |
|---------------------------------|---------------|-------------|-------------------------|-----------|-----------|--|
| Center Number                   | Atomic Number | Atomic Type | Coordinates (Angstroms) |           |           |  |
|                                 |               |             | X                       | Y         | Z         |  |
| 1                               | 7             | 0           | 0.000000                | 0.000000  | 0.118071  |  |
| 2                               | 1             | 0           | 0.000000                | 0.936879  | -0.275499 |  |
| 3                               | 1             | 0           | -0.811361               | -0.468439 | -0.275499 |  |
| 4                               | 1             | 0           | 0.811361                | -0.468439 | -0.275499 |  |

### List of Figures

**Figure S1.** Molecular structures of TATP and HMTD.

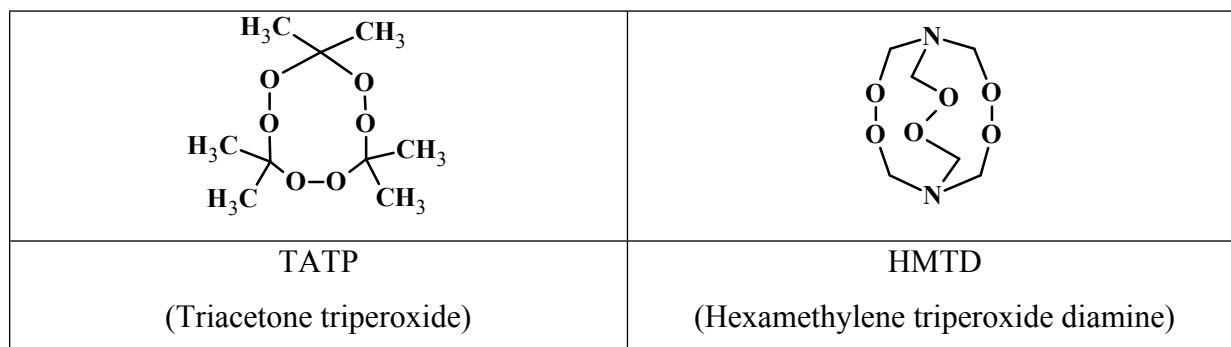

**Figure S2.** Designed isodesmic reactions for the prediction of gas phase HOF (HOF<sub>Gas</sub>) of peracid compounds.

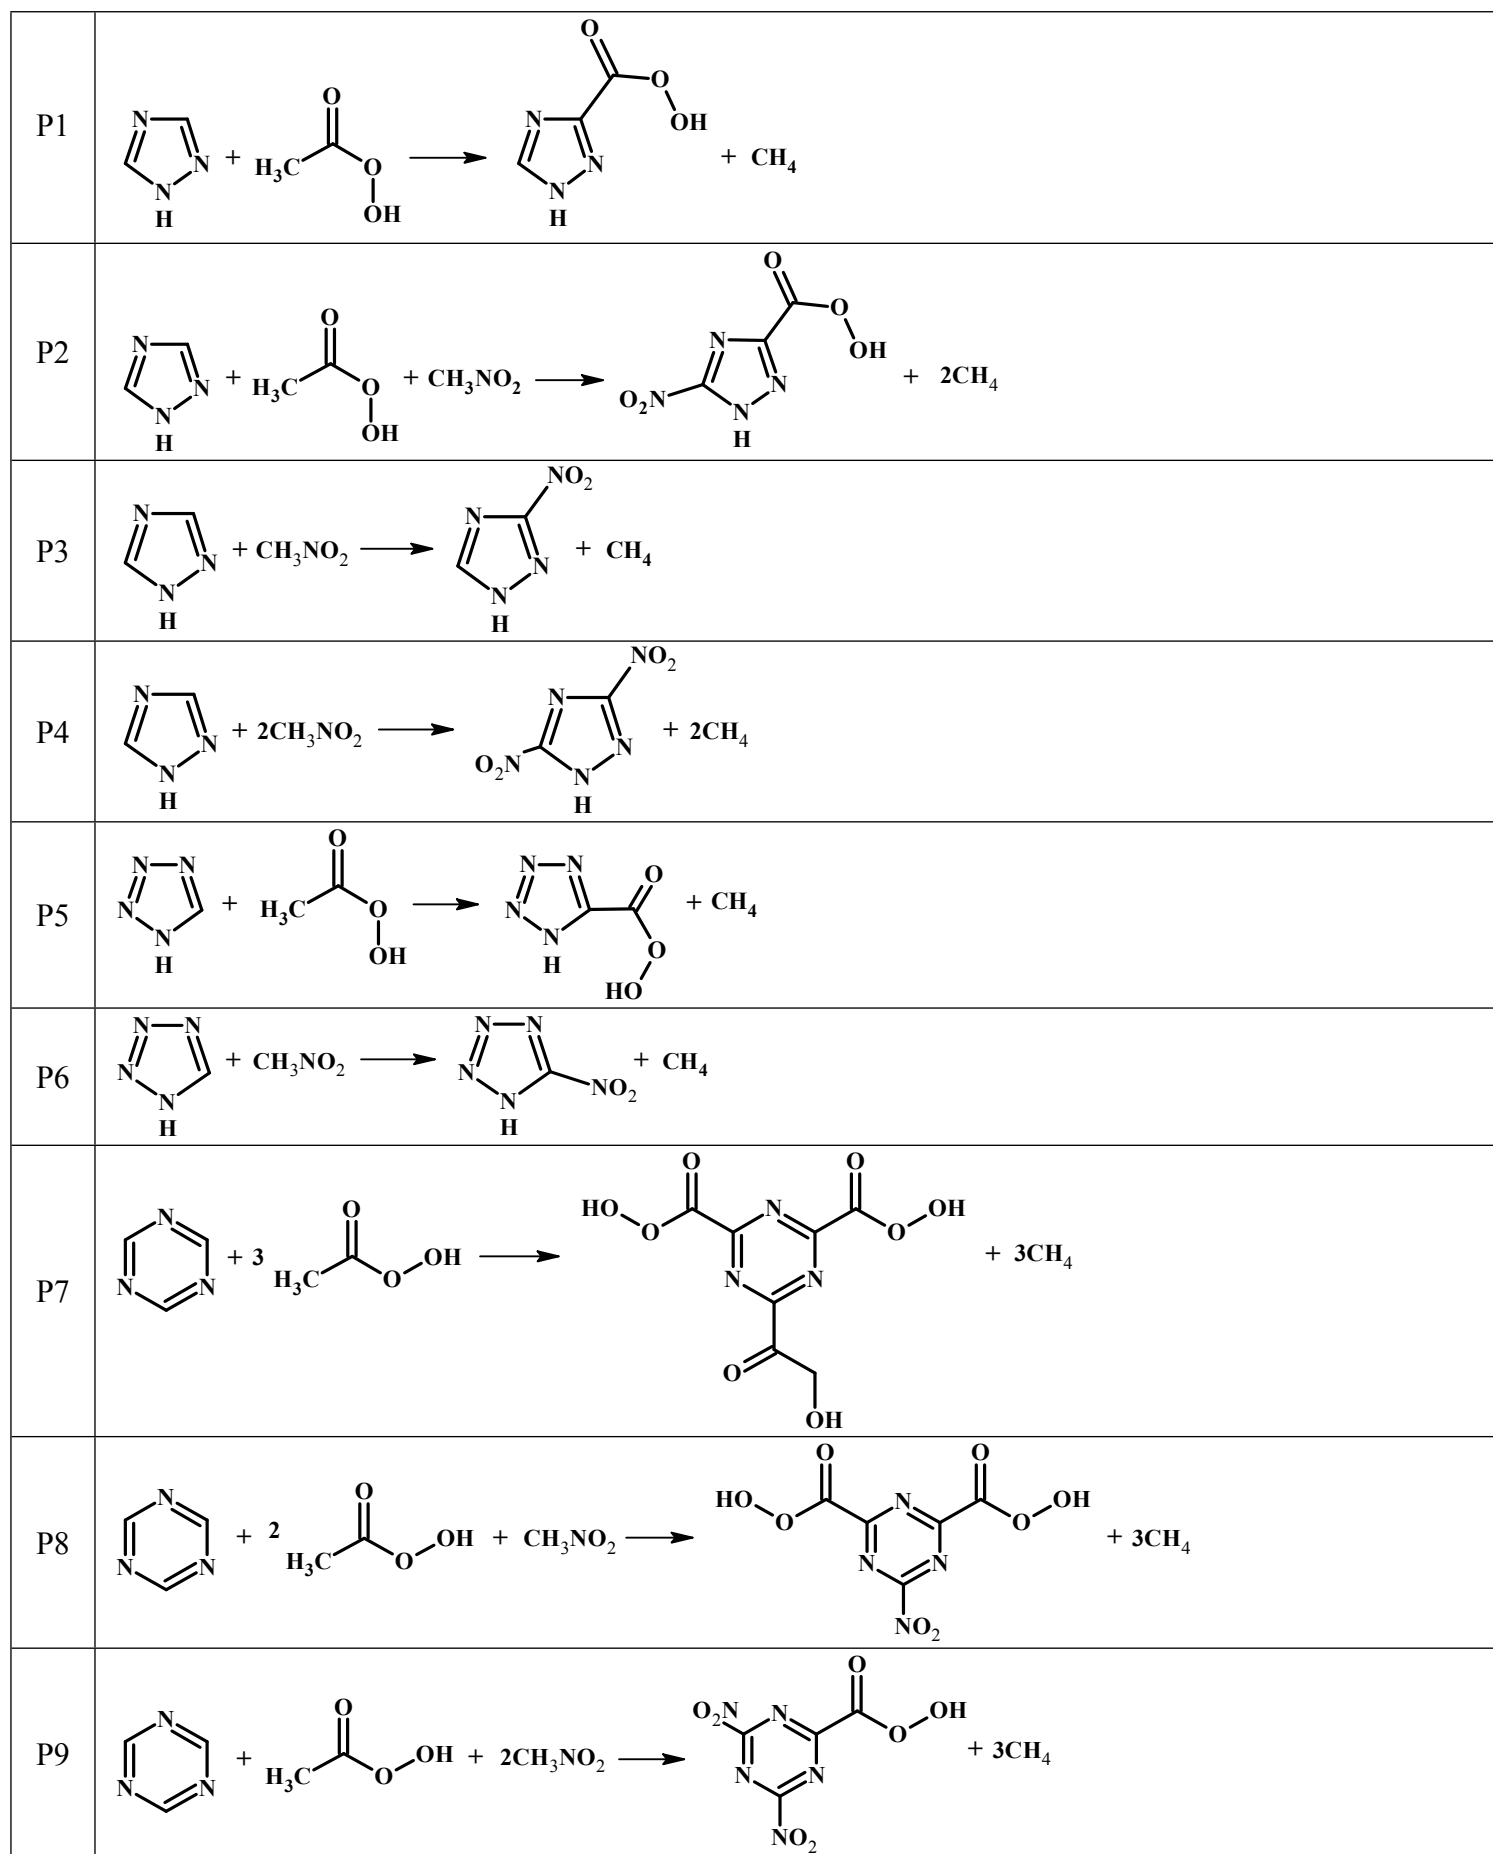

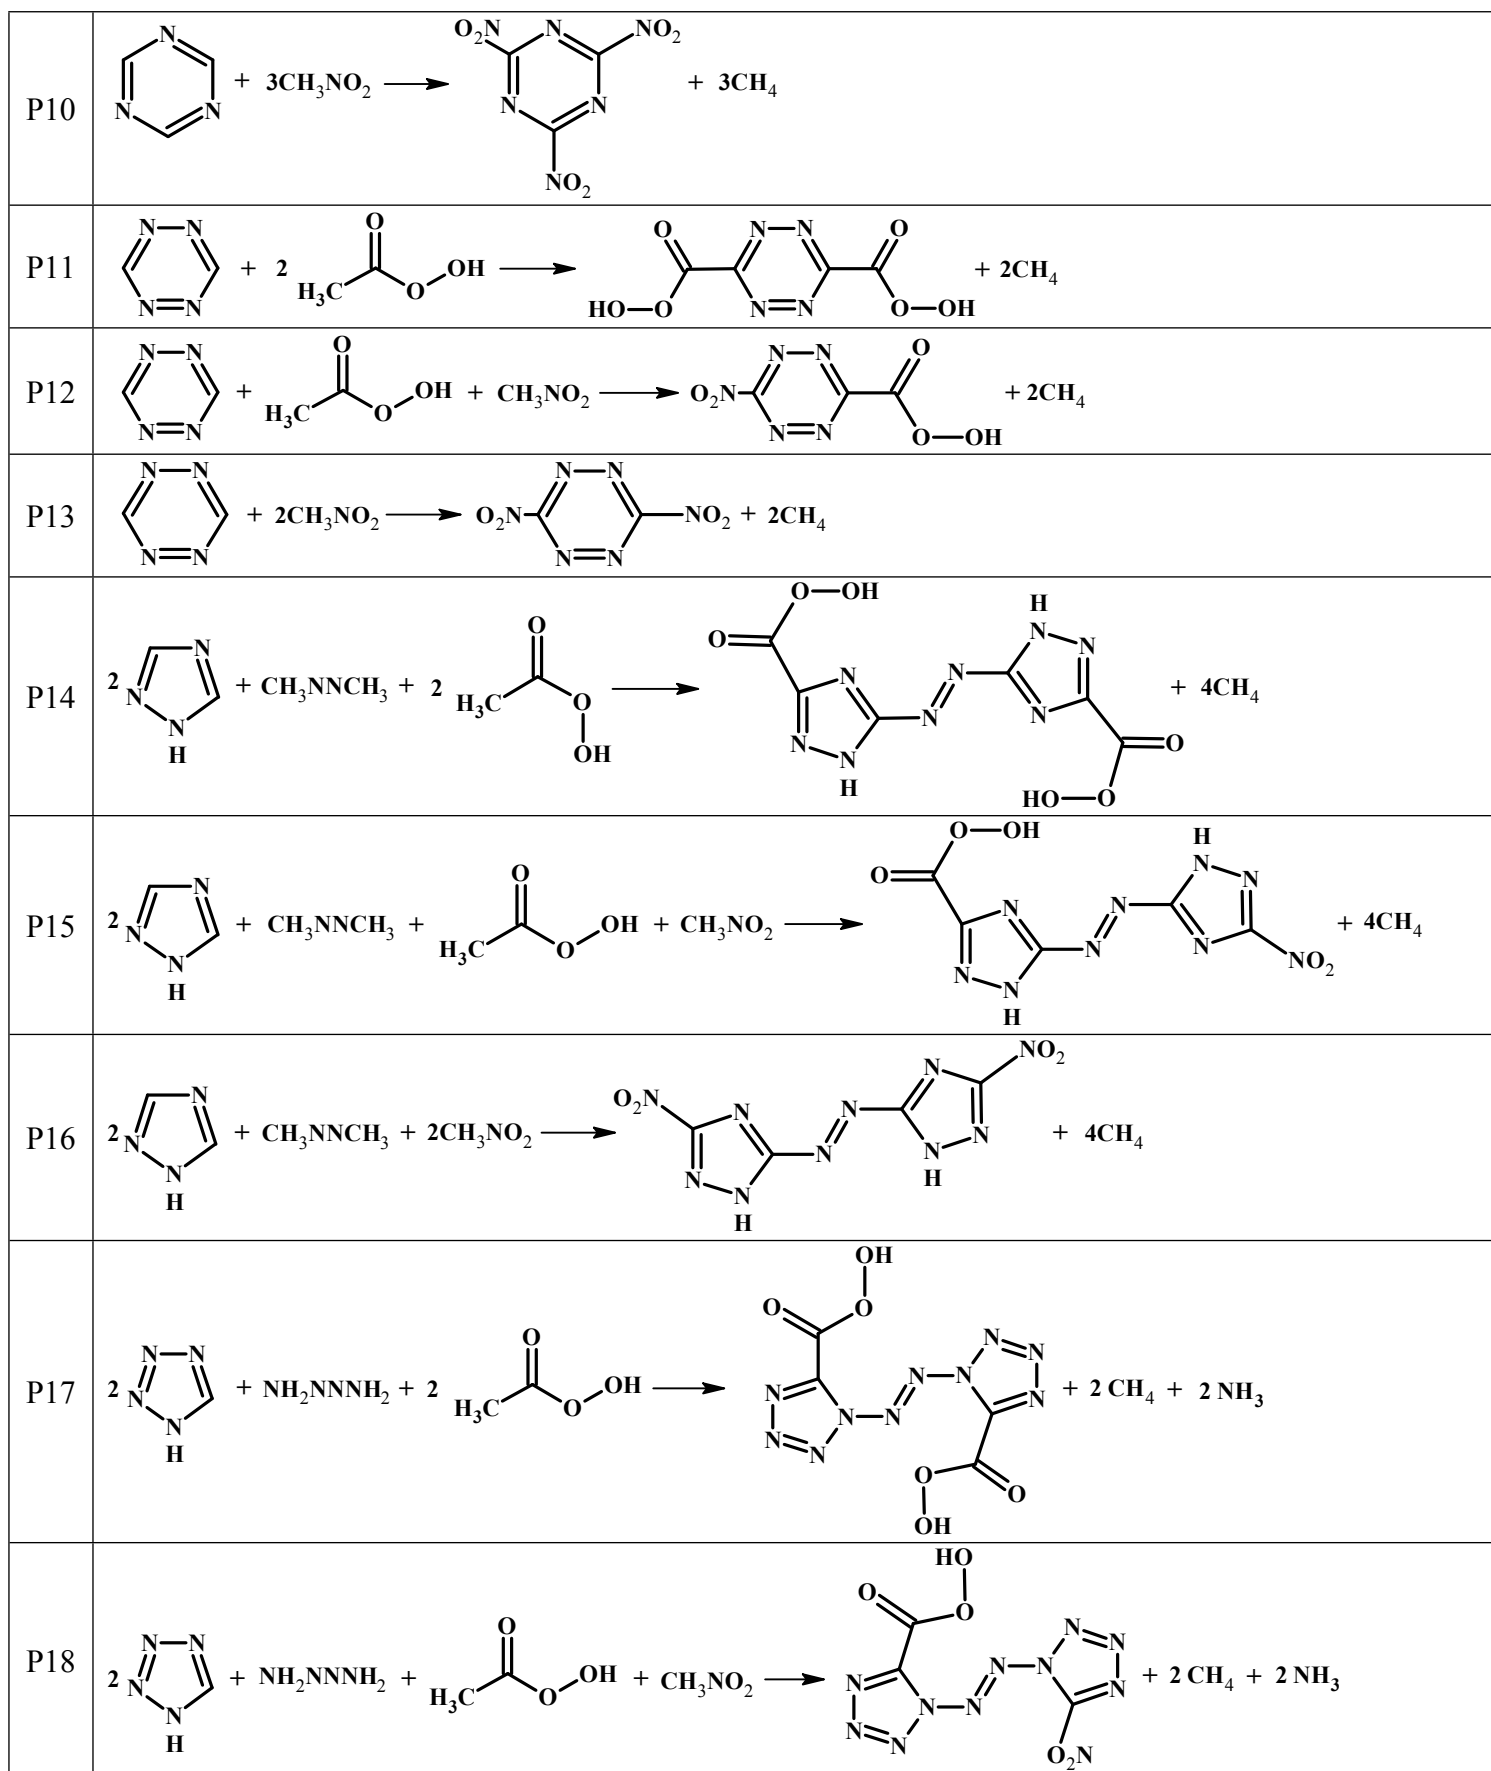

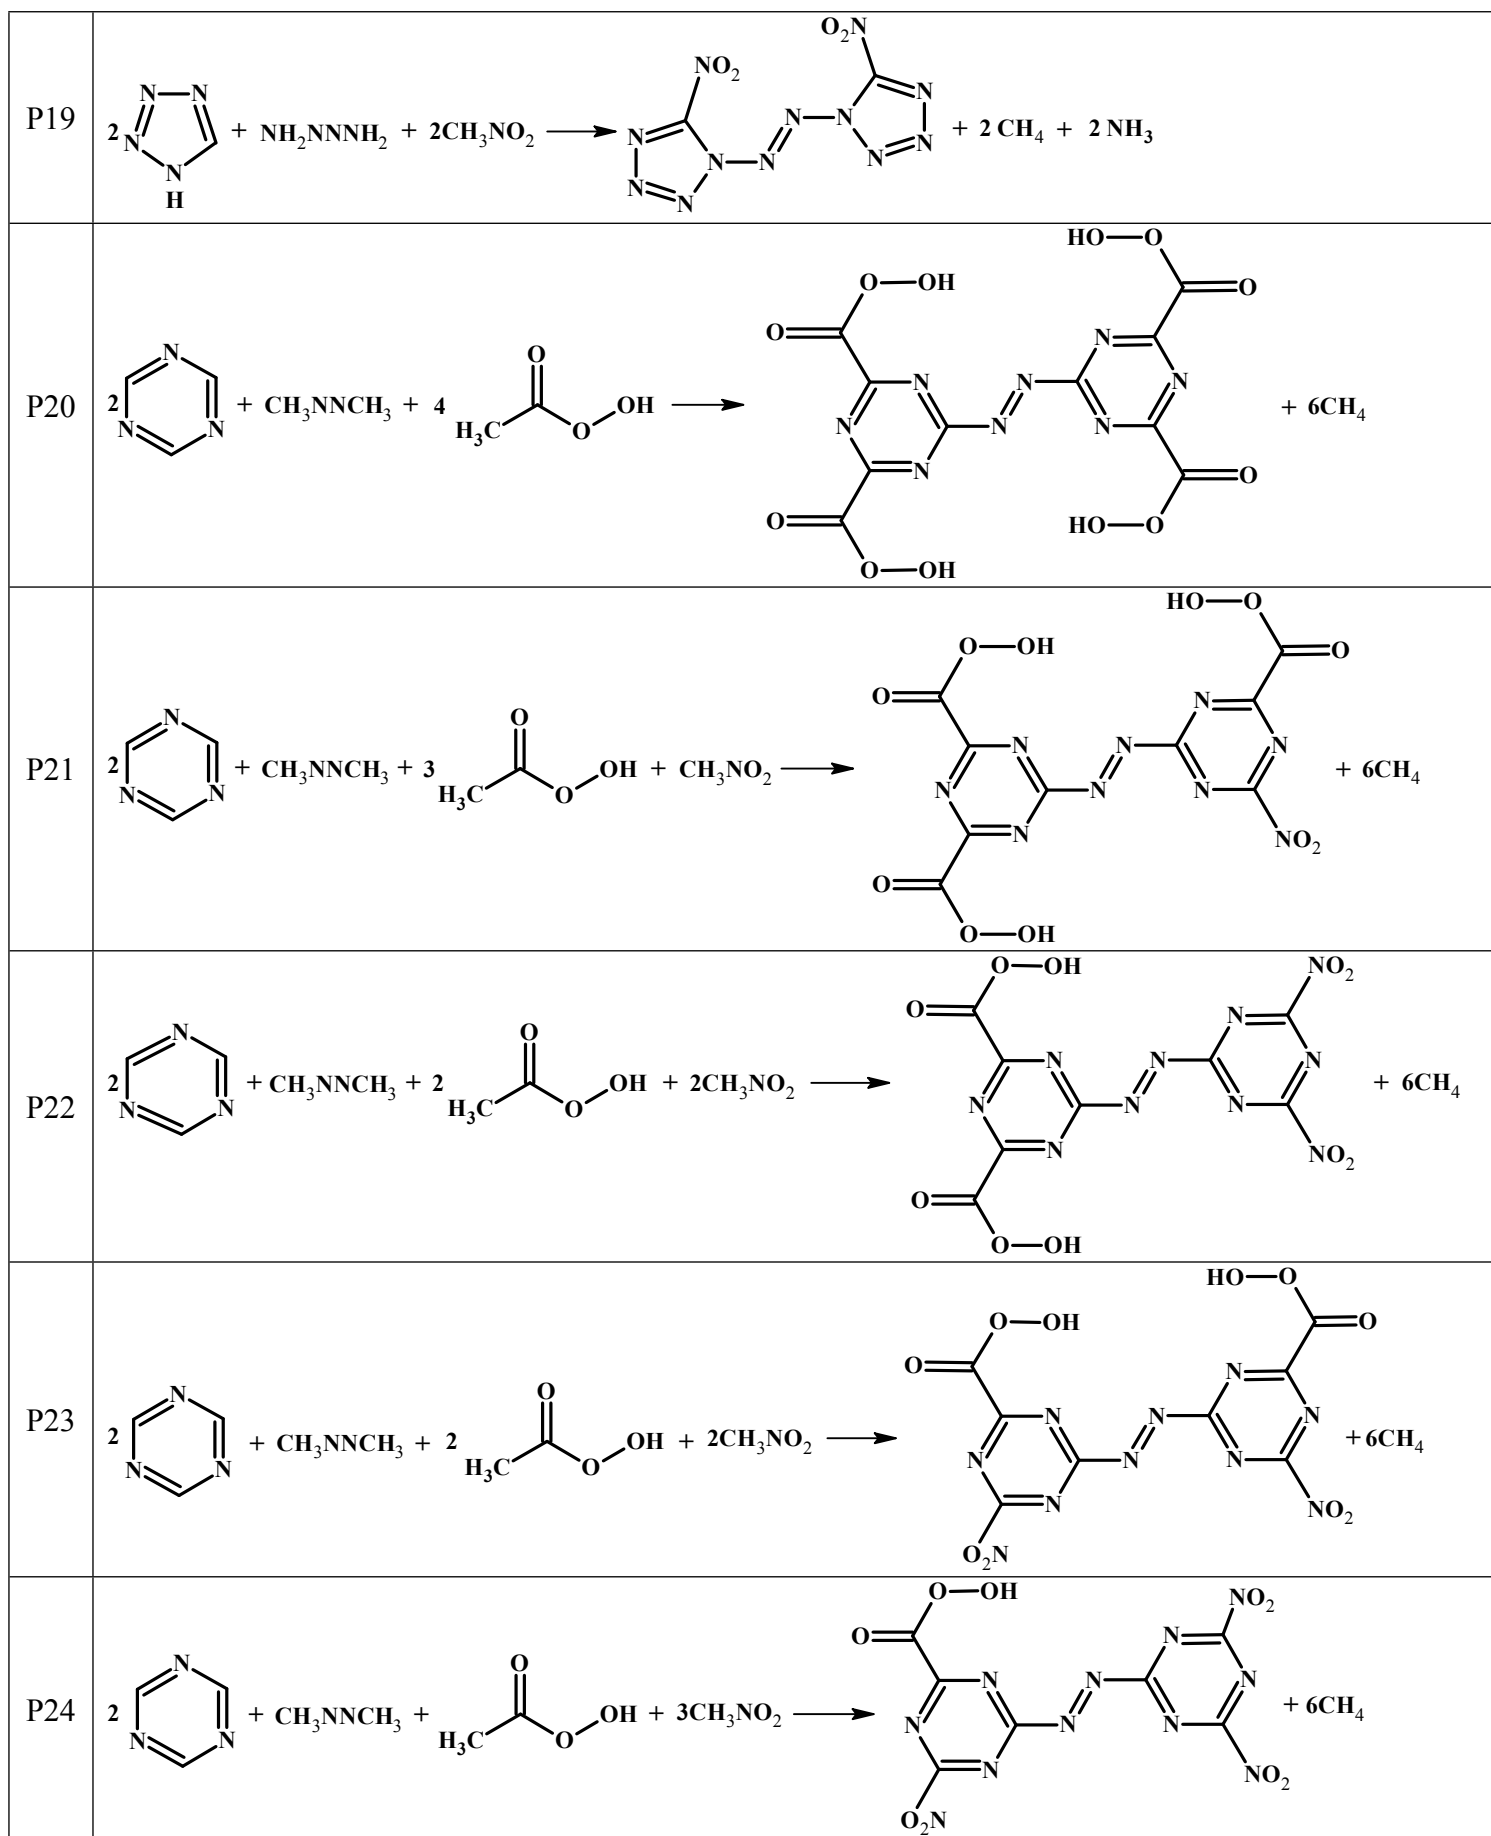

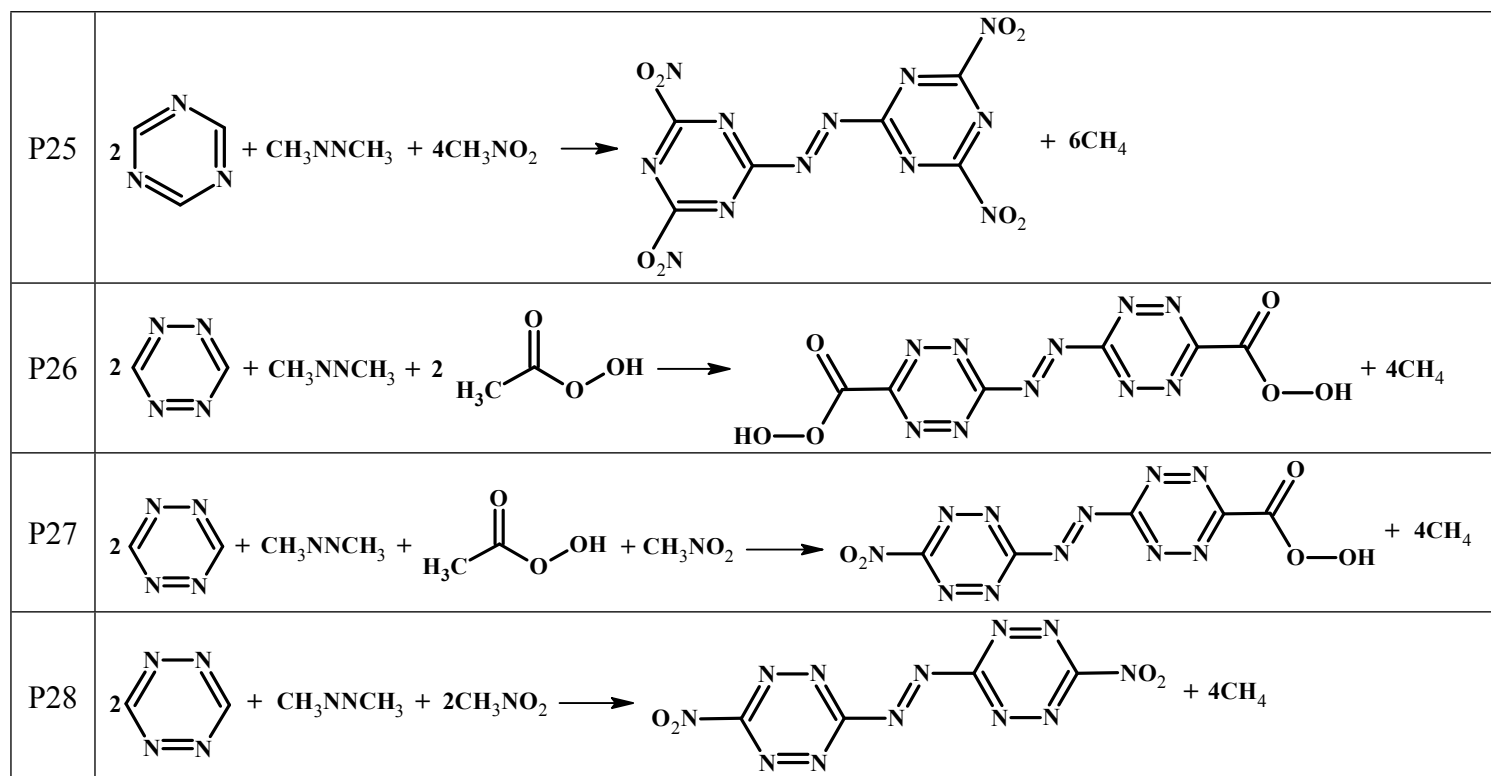

## References

1. Gaussian 09, Revision E.01, M. J. Frisch, G. W. Trucks, H. B. Schlegel, G. E. Scuseria, M. A. Robb, J. R. Cheeseman, G. Scalmani, V. Barone, B. Mennucci, G. A. Petersson, H. Nakatsuji, M. Caricato, X. Li, H. P. Hratchian, A. F. Izmaylov, J. Bloino, G. Zheng, J. L. Sonnenberg, M. Hada, M. Ehara, K. Toyota, R. Fukuda, J. Hasegawa, M. Ishida, T. Nakajima, Y. Honda, O. Kitao, H. Nakai, T. Vreven, Jr. J. A. Montgomery, J. E. Peralta, F. Ogliaro, M. Bearpark, J. J. Heyd, E. Brothers, K. N. Kudin, V. N. Staroverov, R. Kobayashi, J. Normand, K. Raghavachari, A. Rendell, J. C. Burant, S. S. Iyengar, J. Tomasi, M. Cossi, N. Rega, J. M. Millam, M. Klene, J. E. Knox, J. B. Cross, V. Bakken, C. Adamo, J. Jaramillo, R. Gomperts, R. E. Stratmann, O. Yazyev, A. J. Austin, R. Cammi, C. Pomelli, J. W. Ochterski, R. L. Martin, K. Morokuma, V. G. Zakrzewski, G. A. Voth, P. Salvador, J. J. Dannenberg, S. Dapprich, A. D. Daniels, O. Farkas, J. B. Foresman, J. V. Ortiz, J. Cioslowski and D. J. Fox, *Gaussian*, Inc., Wallingford CT, 2013.

2. P. Politzer, Y. Ma, P. Lane and M. C. Concha, *Int. J. Quant. Chem.*, 2005, **105**, 341.
3. T. Lu and F. Chen, *J. Comput. Chem.*, 2012, **33**, 580.
4. C. L. Mader, In *Organic Energetic Compounds*; Markinas, P. L., Ed.; Nova Science Publishers: Commack, New York, 1996; p. 193.
5. S. Beaucamp, N. Marchet, D. Mathieu and V. Agafonov, *Acta Crystallographica Sec. B*, **59**, 2003, 498-504.
6. C. M. Tarver, *J. Chem. Eng. Data*, 1979, **24**, 136.
7. C. Ye and J. M. Shreeve, *J. Chem. Eng. Data*, 2008, **53**, 520–524.
8. C. Ye and J. M. Shreeve, *J. Phys. Chem. A*, 2007, **111**, 1456-1461.
9. B. M. Rice and D. M. Sorescu, *J. Phys. Chem. B*, 2004, **108**, 17730-17739.
10. P. Politzer and J. S. Murray, *Cent. Eur. J. Energ. Mater.*, 2014, **11**, 459-474.
11. M. J. Kamlet and S. J. Jacobs, *J. Chem. Phys.*, 1968, **48**, 23–35.
12. P. Politzer, J. Martinez, J. S. Murray, M. C. Concha and A. Toro-Labbé, An Electrostatic Interaction Correction for Improved Crystal Density Prediction, *Mol. Phys.* 2009, **107**, 2095.
13. H. Muthurajan and A. H. Ghee, *Cent. Eur. J. Energ. Mater.*, 2008, **5**, 19-35.
14. J. Akhavan, *The Chemistry of Explosives*, Second ed., RSC Paperbacks, 2004.
15. M. H. Keshavarz, F. Seif and H. Soury, *Propellants Explos. Pyrotech.* 2014, **39**, 284.
16. R. W. Gurney, *The Initial Velocities of Fragments from Bombs, Shells and Grenades*, Ballistic Research Laboratory, Aberdeen, Maryland, BRL report 405, 1943.
17. M. J. Kamlet and M. Finger, *Combust. Flame*, 1979, **34**, 213-214.
18. D. R. Hardesty and J. E. Kennedy, *Combust. Flame* 1977, **28**, 45.
19. S. Venugopalan, *Demystifying Explosives: Concepts in High Energy Materials*, Elsevier Inc., 2015
20. V. D. Ghule, *J. Phys. Chem. A*, 2012, **116**, 9391.

21. A. K. Sikder, G. Maddalla, J. P. Agraval and H. Singh, *J. Hazard. Mater.*, 2001, **84**, 1
22. D. M. Badgular, M. B. Talawar, S. N. Asthana and P. P. Mahulikar, *J. Hazard. Mater.* 2008, **151**, 289.
23. P. Jimenez, M. V. Roux and C. Turrion, *J. Chem. Thermodyn.*, 1989, **21**, 759-764.
24. A. A. Balepin, V. P. Lebedev, E. A. Miroshnichenko, G. I. Koldobskii, V. A. Ostovskii, B. P. Larionov, B. V. Gidasov and Y. A. Lebedev, *Svoistva Veshchestv Str. Mol.*, 1977, 93-98.
25. K. Bystrom, *J. Chem. Thermodyn.*, 1982, **14**, 865-870.
26. Y. K. Knobel, E. A. Miroshnichenko and Y. A. Lebedev, *Bull. Acad. Sci. USSR, Div. Chem. Sci.*, 1971, 425-428.
27. M. W. Jr. Chase, *NIST-JANAF Thermochemical Tables*, Fourth Edition, J. Phys. Chem. Ref. Data, Monograph 9, 1998, 1-1951.
28. J. D. Cox, D. D. Wagman and V. A. Medvedev, *CODATA Key Values for Thermodynamics*, Hemisphere Publishing Corp., New York, 1984, 1.
